# Supplementary material
Source: publisher site journal article supplement (https://www.dovepress.com/article/434970)
Supplement: Supplementary file 1 [file get_supplementary_file.php]

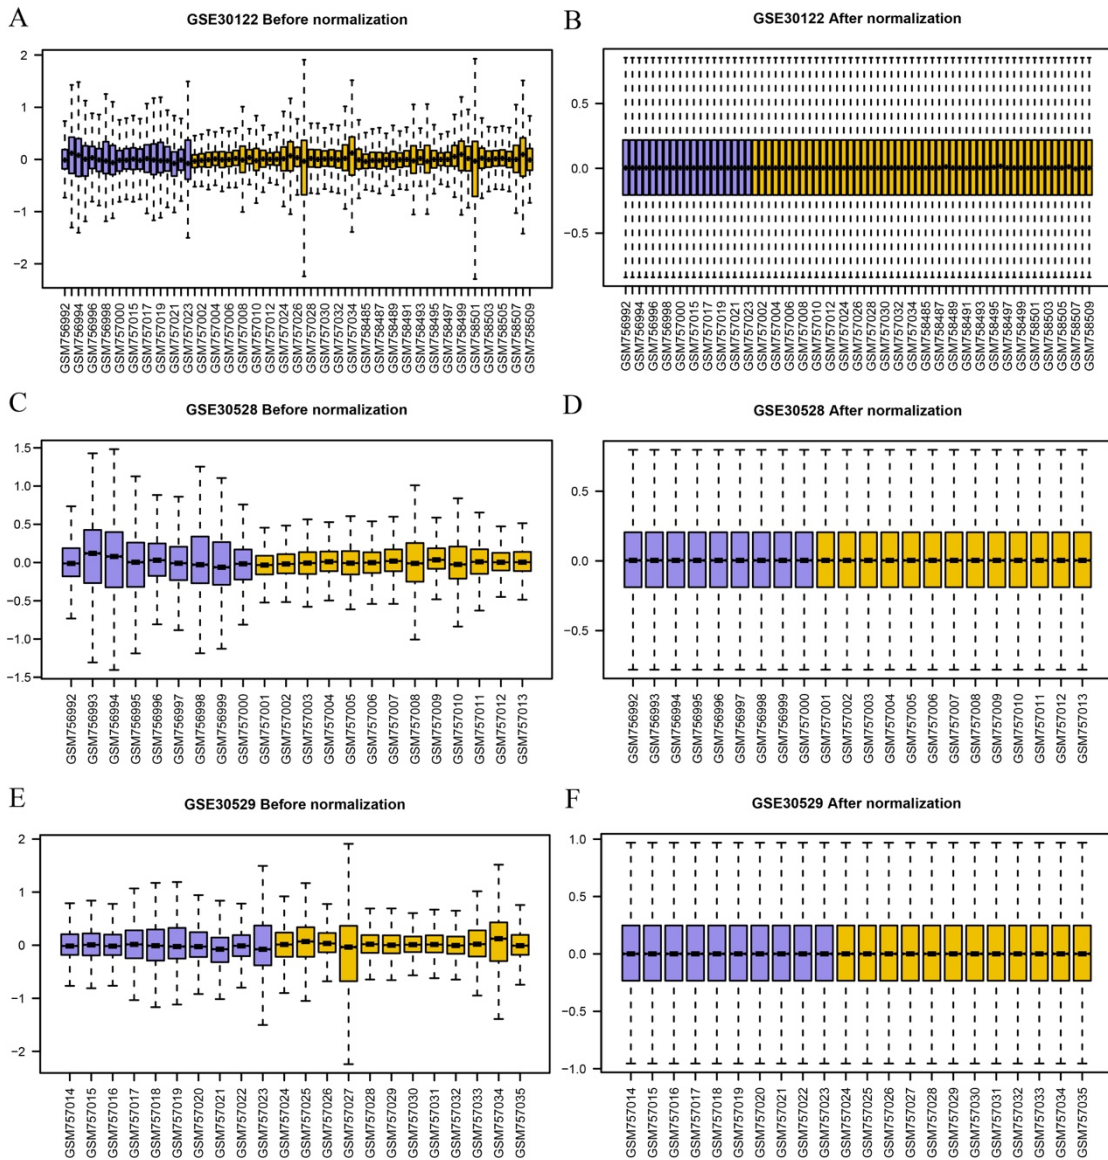

**Supplementary Figure 1:** Normalized boxplots for each dataset. **(A)** Box plot of gene expression distribution between samples of the dataset GSE30122 before correction. **(B)** Box plot of the distribution of gene expression between samples of the dataset GSE30122 after correction. **(C)** Box plot of gene expression distribution between samples of the dataset GSE30528 before correction. **(D)** Box plot of the distribution of gene expression between samples of the dataset GSE30528 after correction. **(E)** Box plot of gene expression distribution between samples of the dataset GSE30529 before correction. **(F)** Box plot of the distribution of gene expression between samples of the dataset GSE30529 after correction. Yellow represents the Normal group, and purple represents the diabetic kidney disease group.

**Supplementary Table 1.** The 853 ferroptosis-related genes.

| Ferroptosis-related genes |               |               |               |                |               |               |                 |                |                  |                |
|---------------------------|---------------|---------------|---------------|----------------|---------------|---------------|-----------------|----------------|------------------|----------------|
| <i>Rptor</i>              | <i>Mir497</i> | <i>Gls2</i>   | <i>Ube2D3</i> | <i>Abcc5</i>   | <i>Psm1</i>   | <i>Myh10</i>  | <i>Kbtbd3</i>   | <i>Msr3</i>    | <i>Fads1</i>     | <i>P4Hb</i>    |
| <i>Hepfal</i>             | <i>Got1</i>   | <i>Styk1</i>  | <i>Alas2</i>  | <i>Bsg</i>     | <i>Anxa4</i>  | <i>Prdx2</i>  | <i>Srsf8</i>    | <i>Polr2E</i>  | <i>Agpat3</i>    | <i>Suv39H1</i> |
| <i>Aifm2</i>              | <i>Decr1</i>  | <i>Nkap</i>   | <i>Ccl5</i>   | <i>Fxr1</i>    | <i>Eif4H</i>  | <i>Vapb</i>   | <i>Ighg4</i>    | <i>Prpf8</i>   | <i>Pex12</i>     | <i>Atf2</i>    |
| <i>Gpx4</i>               | <i>Ech1</i>   | <i>Rbms1</i>  | <i>Cul4A</i>  | <i>Sqle</i>    | <i>Psme1</i>  | <i>Ywhaz</i>  | <i>Kiaa1614</i> | <i>Rbbp7</i>   | <i>Chp1</i>      | <i>Brd2</i>    |
| <i>Slc7A11</i>            | <i>Dhodh</i>  | <i>Sesn2</i>  | <i>Ngly1</i>  | <i>Ttbk2</i>   | <i>Rpl7A</i>  | <i>Actc1</i>  | <i>Tuba4B</i>   | <i>Alox12B</i> | <i>Gpat4</i>     | <i>Brd3</i>    |
| <i>Nfe2L2</i>             | <i>Stk11</i>  | <i>Miox</i>   | <i>Rbx1</i>   | <i>Cep290</i>  | <i>Rps2</i>   | <i>Cct5</i>   | <i>Igkv1-5</i>  | <i>Alox15B</i> | <i>Brpf1</i>     | <i>Brdt</i>    |
| <i>Tp53</i>               | <i>Pla2G6</i> | <i>Pir</i>    | <i>Cul4B</i>  | <i>Igf2Bp3</i> | <i>Snap29</i> | <i>Ckb</i>    | <i>Iglv3-19</i> | <i>Ano6</i>    | <i>Osbpl9</i>    | <i>Ncoa3</i>   |
| <i>Acsl4</i>              | <i>Hnrmpd</i> | <i>Pvt1</i>   | <i>H1-4</i>   | <i>Itgb8</i>   | <i>Cltb</i>   | <i>Ewsr1</i>  | <i>Net1</i>     | <i>Cisd2</i>   | <i>Ints2</i>     | <i>Nr5A2</i>   |
| <i>Tfrc</i>               | <i>Tigar</i>  | <i>Mir362</i> | <i>Nfe2L1</i> | <i>Lasp1</i>   | <i>Krt6B</i>  | <i>Pdia3</i>  | <i>Mir494</i>   | <i>Copb1</i>   | <i>Mmd</i>       | <i>Panx2</i>   |
| <i>Ncoa4</i>              | <i>Ftl</i>    | <i>Mir670</i> | <i>Setdb1</i> | <i>Apoc1</i>   | <i>Psm8</i>   | <i>Trim28</i> | <i>Aifm1</i>    | <i>Eloc</i>    | <i>Cyp4F8</i>    | <i>Arf6</i>    |
| <i>Hmox1</i>              | <i>Fdft1</i>  | <i>Vdac1</i>  | <i>Pdss2</i>  | <i>Copz1</i>   | <i>Txn1</i>   | <i>Xrcc5</i>  | <i>Pdcd1</i>    | <i>Gpx2</i>    | <i>Mllt1</i>     | <i>Gdf15</i>   |
| <i>Slc40A1</i>            | <i>Txnrd1</i> | <i>Idh2</i>   | <i>Cyb5R1</i> | <i>Hlf</i>     | <i>Myl12A</i> | <i>Dut</i>    | <i>Ndufs7</i>   | <i>Rb1Cc1</i>  | <i>Ttpa</i>      | <i>Abhd12</i>  |
| <i>Slc3A2</i>             | <i>Lpcat3</i> | <i>Nfkb1</i>  | <i>H1-5</i>   | <i>Rnf182</i>  | <i>Stom</i>   | <i>Prok2</i>  | <i>Lpin2</i>    | <i>Rps12</i>   | <i>Gria3</i>     | <i>Tfam</i>    |
| <i>Vdac3</i>              | <i>Fscn1</i>  | <i>Kat5</i>   | <i>Sema5A</i> | <i>Pcdhb14</i> | <i>Tpm4</i>   | <i>Ptbp1</i>  | <i>Siah2</i>    | <i>Rps23</i>   | <i>Pom121L12</i> | <i>Rnf113A</i> |
| <i>Alox15</i>             | <i>Nf2</i>    | <i>Phgdh</i>  | <i>Abcb10</i> | <i>Atxn8Os</i> | <i>Fkbp3</i>  | <i>Rpa2</i>   | <i>Ciao1</i>    | <i>Rps27A</i>  | <i>Aebp2</i>     | <i>Ppara</i>   |

|                 |                |                |                  |                  |                |                |                 |                |               |               |
|-----------------|----------------|----------------|------------------|------------------|----------------|----------------|-----------------|----------------|---------------|---------------|
| <i>Cbs</i>      | <i>Xrcc6</i>   | <i>Dld</i>     | <i>H1-2</i>      | <i>Meg8</i>      | <i>Tpd52L2</i> | <i>Rpl10</i>   | <i>Lpin3</i>    | <i>Sting1</i>  | <i>Agps</i>   | <i>Mtf1</i>   |
| <i>Ireb2</i>    | <i>Cct3</i>    | <i>Hnrnpa1</i> | <i>Cygb</i>      | <i>Mir129-1</i>  | <i>Anp32B</i>  | <i>Rpl15</i>   | <i>Ciao2A</i>   | <i>Tnpo1</i>   | <i>Cdca3</i>  | <i>Nupr1</i>  |
| <i>Becn1</i>    | <i>Atm</i>     | <i>Jun</i>     | <i>Dcaf8</i>     | <i>Cers6-As1</i> | <i>Decr2</i>   | <i>Atp5F1B</i> | <i>Otud1</i>    | <i>Usp11</i>   | <i>Pex2</i>   | <i>Hsf1</i>   |
| <i>Akr1C1</i>   | <i>Tnf</i>     | <i>Lifr</i>    | <i>H1-1</i>      | <i>Linc01833</i> | <i>Dnajc9</i>  | <i>Banf1</i>   | <i>Shh</i>      | <i>Aldh1L1</i> | <i>Pex6</i>   | <i>Parp1</i>  |
| <i>Hspb1</i>    | <i>Skp2</i>    | <i>Stub1</i>   | <i>H1-3</i>      | <i>Mir4443</i>   | <i>Trim26</i>  | <i>Cnbp</i>    | <i>Tgfb2</i>    | <i>Bnip3</i>   | <i>Timm9</i>  | <i>Parp2</i>  |
| <i>Fth1</i>     | <i>Slc39A7</i> | <i>Mdm4</i>    | <i>Paqr3</i>     | <i>Mir761</i>    | <i>Pym1</i>    | <i>Itih3</i>   | <i>Gfra1</i>    | <i>Copg1</i>   | <i>Dcaf7</i>  | <i>Parp3</i>  |
| <i>Por</i>      | <i>Atg16L1</i> | <i>Sox2</i>    | <i>Ufl1</i>      | <i>Egfr</i>      | <i>Ccdc124</i> | <i>Lrpprc</i>  | <i>Pkn2</i>     | <i>Dnaja1</i>  | <i>Lce2C</i>  | <i>Parp4</i>  |
| <i>Pcbp1</i>    | <i>Zfp36</i>   | <i>Dkk1</i>    | <i>Commd10</i>   | <i>Pdgfrb</i>    | <i>Mir9-1</i>  | <i>Rpl26</i>   | <i>Ubr2</i>     | <i>Id1</i>     | <i>Far1</i>   | <i>Parp6</i>  |
| <i>Atg7</i>     | <i>H2Ac1</i>   | <i>Ltbp2</i>   | <i>Wdr76</i>     | <i>Pim1</i>      | <i>Mir137</i>  | <i>Dhx9</i>    | <i>Mir194-1</i> | <i>Maged2</i>  | <i>Phf21A</i> | <i>Parp8</i>  |
| <i>Yap1</i>     | <i>Mef2C</i>   | <i>Snai2</i>   | <i>H1-10</i>     | <i>Fads2</i>     | <i>Chac1</i>   | <i>Pdia4</i>   | <i>Mir1228</i>  | <i>Rbm10</i>   | <i>Smad7</i>  | <i>Parp9</i>  |
| <i>Ftmt</i>     | <i>Bap1</i>    | <i>Bmal1</i>   | <i>Mir326</i>    | <i>Igf2Bp2</i>   | <i>Bex1</i>    | <i>Rpl13A</i>  | <i>Mir27A</i>   | <i>Rps15</i>   | <i>Lym1</i>   | <i>Parp10</i> |
| <i>Acsl3</i>    | <i>Tgfb1</i>   | <i>Gstz1</i>   | <i>Mir324</i>    | <i>Dpep1</i>     | <i>Nfs1</i>    | <i>Rplp0</i>   | <i>Aurka</i>    | <i>Ube2O</i>   | <i>Amn</i>    | <i>Parp11</i> |
| <i>Map1Lc3B</i> | <i>Adcy10</i>  | <i>Gpx3</i>    | <i>Zfas1</i>     | <i>Fabp4</i>     | <i>Cdh2</i>    | <i>Rps13</i>   | <i>Cdkn2A</i>   | <i>Aldh1L2</i> | <i>Pex3</i>   | <i>Parp12</i> |
| <i>Sat1</i>     | <i>Ssbp1</i>   | <i>Hcar1</i>   | <i>Mir19A</i>    | <i>Fabp1</i>     | <i>Epas1</i>   | <i>Rps7</i>    | <i>Ripk1</i>    | <i>Dnaja2</i>  | <i>Mtch1</i>  | <i>Parp14</i> |
| <i>Otub1</i>    | <i>ErbB2</i>   | <i>Retreg1</i> | <i>Linc00239</i> | <i>Cdk14</i>     | <i>Hpcal1</i>  | <i>Vapa</i>    | <i>Trpv1</i>    | <i>Fat1</i>    | <i>Mapk8</i>  | <i>Parp15</i> |
| <i>Cp</i>       | <i>Ctsb</i>    | <i>Ythdc2</i>  | <i>Lastr</i>     | <i>Dnajb6</i>    | <i>Rb1</i>     | <i>Cct4</i>    | <i>Braf</i>     | <i>Id3</i>     | <i>Cgas</i>   | <i>Parp16</i> |
| <i>Cisd1</i>    | <i>Tlr4</i>    | <i>Usp35</i>   | <i>Mir4735</i>   | <i>Galnt14</i>   | <i>G3Bp1</i>   | <i>Cct6A</i>   | <i>Casp8</i>    | <i>Pcmt1</i>   | <i>Prkca</i>  | <i>Creb3</i>  |

|                 |                |                    |                 |                  |                  |                |                |                |               |                |
|-----------------|----------------|--------------------|-----------------|------------------|------------------|----------------|----------------|----------------|---------------|----------------|
| <i>Map1Lc3C</i> | <i>Pkm</i>     | <i>Mitd1</i>       | <i>Ptgs2</i>    | <i>Me1</i>       | <i>Linc00472</i> | <i>Cct8</i>    | <i>Sf3B2</i>   | <i>Rcn2</i>    | <i>lfng</i>   | <i>Creb5</i>   |
| <i>Fbxw7</i>    | <i>Ywhae</i>   | <i>Mir302A</i>     | <i>Alox5</i>    | <i>Alg3</i>      | <i>Hilpda</i>    | <i>Hmgn1</i>   | <i>Mcu</i>     | <i>Rpl24</i>   | <i>Smpd1</i>  | <i>Akt1S1</i>  |
| <i>Slc1A5</i>   | <i>Nr1H4</i>   | <i>Mir424</i>      | <i>Nedd4</i>    | <i>Chmp1A</i>    | <i>G0S2</i>      | <i>HnrnpI</i>  | <i>Mir4715</i> | <i>Txnip</i>   | <i>Micu1</i>  | <i>Mlst8</i>   |
| <i>Akr1C2</i>   | <i>Cdc25A</i>  | <i>Adamts9-As1</i> | <i>Abcb6</i>    | <i>Arpc1A</i>    | <i>Hspa5</i>     | <i>Hnrnmpm</i> | <i>Chek2</i>   | <i>Cope</i>    | <i>Tor2A</i>  | <i>Cdh1</i>    |
| <i>Akr1C3</i>   | <i>Rack1</i>   | <i>Mir147A</i>     | <i>Fxn</i>      | <i>Klf2</i>      | <i>Bcat2</i>     | <i>Khdrbs1</i> | <i>Ar</i>      | <i>Muc20</i>   | <i>Cltn</i>   | <i>Kif20A</i>  |
| <i>Steap3</i>   | <i>Rpl7</i>    | <i>Mir15A</i>      | <i>Ltf</i>      | <i>Qsox1</i>     | <i>Gdpd5</i>     | <i>Map4</i>    | <i>Cftr</i>    | <i>Asxl2</i>   | <i>Trim46</i> | <i>Mpc1</i>    |
| <i>Pcbp2</i>    | <i>Rps3A</i>   | <i>Mir587</i>      | <i>Pycr1</i>    | <i>Sox15</i>     | <i>Mir874</i>    | <i>Nolc1</i>   | <i>Fgfr4</i>   | <i>Foxk2</i>   | <i>Kdm5A</i>  | <i>Camkk2</i>  |
| <i>Atf4</i>     | <i>Mir30E</i>  | <i>Pgm5P3-As1</i>  | <i>Acadsb</i>   | <i>Mir132</i>    | <i>Mtor</i>      | <i>Plxna4</i>  | <i>Npm1</i>    | <i>Golga4</i>  | <i>Ndrp1</i>  | <i>Srsf9</i>   |
| <i>Gclc</i>     | <i>Dpp4</i>    | <i>Ddr2</i>        | <i>Aco1</i>     | <i>Agap2-As1</i> | <i>Lpin1</i>     | <i>Rpl34</i>   | <i>Smarca4</i> | <i>Nap1L4</i>  | <i>Ptpn6</i>  | <i>Ezh2</i>    |
| <i>Nox4</i>     | <i>Cth</i>     | <i>Yy1</i>         | <i>Adipor1</i>  | <i>Mir1231</i>   | <i>Prc1</i>      | <i>Rplp2</i>   | <i>Vcp</i>     | <i>Rnf113A</i> | <i>Adam23</i> | <i>Trib2</i>   |
| <i>Vdac2</i>    | <i>Cybb</i>    | <i>Sphk1</i>       | <i>Kdm4A</i>    | <i>Mir3938</i>   | <i>Hspa9</i>     | <i>Snrpa</i>   | <i>Cad</i>     | <i>Ankhd1</i>  | <i>Cpeb1</i>  | <i>Ptpn18</i>  |
| <i>Atg5</i>     | <i>Slc11A2</i> | <i>Birc5</i>       | <i>H2Ax</i>     | <i>Itga6</i>     | <i>Hadha</i>     | <i>Pdia6</i>   | <i>Foxo1</i>   | <i>Copg2</i>   | <i>Mib1</i>   | <i>Klhdc3</i>  |
| <i>Park7</i>    | <i>Gch1</i>    | <i>Efemp1</i>      | <i>Jam3</i>     | <i>Prkaa2</i>    | <i>Ruvbl1</i>    | <i>Pfn2</i>    | <i>Gnas</i>    | <i>Gcn1</i>    | <i>Yy1Ap1</i> | <i>Gstm1</i>   |
| <i>Map1Lc3A</i> | <i>Gss</i>     | <i>Hnrnpa2B1</i>   | <i>Yme1L1</i>   | <i>Cd44</i>      | <i>Cbx3</i>      | <i>Rpl30</i>   | <i>Cps1</i>    | <i>Snrpa1</i>  | <i>Egln2</i>  | <i>Rarres2</i> |
| <i>Wwtr1</i>    | <i>Hmgcr</i>   | <i>Lonp1</i>       | <i>Etv4</i>     | <i>Fancd2</i>    | <i>Nap1L1</i>    | <i>Snrpd2</i>  | <i>Eef2</i>    | <i>Armc5</i>   | <i>Mtdh</i>   | <i>Arntl</i>   |
| <i>Prdx6</i>    | <i>Phkg2</i>   | <i>Wdr5</i>        | <i>Slc25A10</i> | <i>Alox12</i>    | <i>Mt1G</i>      | <i>Snu13</i>   | <i>Grn</i>     | <i>Hcfc2</i>   | <i>Il1B</i>   | <i>Tmbim4</i>  |
| <i>Prkaa1</i>   | <i>Slc39A8</i> | <i>Fbln1</i>       | <i>Plin2</i>    | <i>Nqo1</i>      | <i>H19</i>       | <i>Ybx1</i>    | <i>Mif</i>     | <i>Lancl2</i>  | <i>Pex10</i>  | <i>Slc16A1</i> |

|                |                  |                |                 |               |                |                 |                |                 |                 |               |
|----------------|------------------|----------------|-----------------|---------------|----------------|-----------------|----------------|-----------------|-----------------|---------------|
| <i>Acs1</i>    | <i>Slc39A14</i>  | <i>Cd82</i>    | <i>Rhot1</i>    | <i>Mapk1</i>  | <i>Mir106B</i> | <i>Fam120A</i>  | <i>Muc1</i>    | <i>Nap1L5</i>   | <i>Lig3</i>     | <i>Fndc5</i>  |
| <i>Mdm2</i>    | <i>Nox1</i>      | <i>Pdk4</i>    | <i>Csrp2</i>    | <i>Myc</i>    | <i>Tgfbr1</i>  | <i>Naca</i>     | <i>Hadhb</i>   | <i>Sprrr1A</i>  | <i>Brd7</i>     | <i>Glr5</i>   |
| <i>Lcn2</i>    | <i>Acs15</i>     | <i>RbmX</i>    | <i>Stoml2</i>   | <i>Ldha</i>   | <i>Snca</i>    | <i>Rps4X</i>    | <i>Fhl2</i>    | <i>Foxk1</i>    | <i>Slc25A28</i> | <i>Furin</i>  |
| <i>Scd</i>     | <i>Gclm</i>      | <i>Asah2</i>   | <i>Cirbp</i>    | <i>Pcna</i>   | <i>Uchl1</i>   | <i>Alyref</i>   | <i>Hcfc1</i>   | <i>Klhdc2</i>   | <i>Tsc1</i>     | <i>Tmsb4X</i> |
| <i>Rela</i>    | <i>Slc38A1</i>   | <i>Hnrnpc</i>  | <i>Dazap1</i>   | <i>Actb</i>   | <i>Gstp1</i>   | <i>Hnrnpa3</i>  | <i>Htr1D</i>   | <i>Dusp26</i>   | <i>Ifna1</i>    | <i>Tmsb4Y</i> |
| <i>Tf</i>      | <i>Acs16</i>     | <i>Mgst1</i>   | <i>Mettl14</i>  | <i>Alb</i>    | <i>Vim</i>     | <i>Muc16</i>    | <i>Abca4</i>   | <i>Foxi2</i>    | <i>Ifna2</i>    | <i>Stat3</i>  |
| <i>Neat1</i>   | <i>Chmp5</i>     | <i>Cul9</i>    | <i>Bnc1</i>     | <i>Egln1</i>  | <i>Pgk1</i>    | <i>Myl6B</i>    | <i>Huwe1</i>   | <i>Foxi3</i>    | <i>Ifna4</i>    | <i>Foxc1</i>  |
| <i>Mir214</i>  | <i>Coq2</i>      | <i>Isca2</i>   | <i>Gabpb1</i>   | <i>Hspa8</i>  | <i>Tuba1A</i>  | <i>Rufy1</i>    | <i>Kpna2</i>   | <i>Otud6A</i>   | <i>Ifna5</i>    | <i>Kdm3B</i>  |
| <i>Il6</i>     | <i>Sat2</i>      | <i>Hnr</i>     | <i>C19Orf12</i> | <i>Krt18</i>  | <i>Uba1</i>    | <i>Slc25A31</i> | <i>Rps6Kb2</i> | <i>Mir124-1</i> | <i>Ifna6</i>    | <i>Sirt6</i>  |
| <i>Hmgb1</i>   | <i>Chmp6</i>     | <i>Smg9</i>    | <i>Zscan25</i>  | <i>Anxa2</i>  | <i>Aldoa</i>   | <i>Snrpd1</i>   | <i>Ruvbl2</i>  | <i>Mir7-1</i>   | <i>Ifna7</i>    | <i>Rps6</i>   |
| <i>Sirt3</i>   | <i>Grik1-As2</i> | <i>Trim7</i>   | <i>Alkbh5</i>   | <i>Map3K5</i> | <i>Fasn</i>    | <i>Usp44</i>    | <i>Sf3B1</i>   | <i>Rpl8</i>     | <i>Ifna8</i>    | <i>Hp</i>     |
| <i>Sp1</i>     | <i>Idh1</i>      | <i>Hddc3</i>   | <i>Slirp</i>    | <i>Mdh2</i>   | <i>Gpi</i>     | <i>Wbp11</i>    | <i>C1Qbp</i>   | <i>Atp5Mc3</i>  | <i>Ifna10</i>   | <i>H2Ac21</i> |
| <i>Elavl1</i>  | <i>Pten</i>      | <i>Yy2</i>     | <i>Scgb1D2</i>  | <i>Tpm1</i>   | <i>Myh9</i>    | <i>Wtap</i>     | <i>Copb2</i>   | <i>Cs</i>       | <i>Ifna13</i>   | <i>Kpnb1</i>  |
| <i>Tnfaip3</i> | <i>Gja1</i>      | <i>Cisd3</i>   | <i>Peds1</i>    | <i>Hif1A</i>  | <i>Tubb4A</i>  | <i>Cntnap4</i>  | <i>Ogt</i>     | <i>Emc2</i>     | <i>Ifna14</i>   | <i>Elovl5</i> |
| <i>Panx1</i>   | <i>Gsk3B</i>     | <i>Bdnf-As</i> | <i>Tmed8</i>    | <i>Fh</i>     | <i>Ywhag</i>   | <i>Erh</i>      | <i>Polr2B</i>  | <i>Acsf2</i>    | <i>Ifna16</i>   | <i>Srebf2</i> |
| <i>Atf3</i>    | <i>Prdx1</i>     | <i>Hulc</i>    | <i>Mir127</i>   | <i>Krt14</i>  | <i>Anxa1</i>   | <i>Ksr2</i>     | <i>Prmt7</i>   | <i>Nox3</i>     | <i>Ifna17</i>   | <i>Lamp2</i>  |
| <i>Keap1</i>   | <i>Cav1</i>      | <i>Mir370</i>  | <i>Mir375</i>   | <i>Phb1</i>   | <i>Eno2</i>    | <i>Ngb</i>      | <i>Rbbp4</i>   | <i>Nox5</i>     | <i>Ifna21</i>   | <i>Usp14</i>  |

|                  |               |                  |                   |                 |                |                 |                |               |               |                 |
|------------------|---------------|------------------|-------------------|-----------------|----------------|-----------------|----------------|---------------|---------------|-----------------|
| <i>Kras</i>      | <i>Prkcb</i>  | <i>Mir338</i>    | <i>Mir106A</i>    | <i>Tpm3</i>     | <i>Rpl5</i>    | <i>Rpl38</i>    | <i>Rps10</i>   | <i>Duox1</i>  | <i>Piezo1</i> | <i>Erc6</i>     |
| <i>Prom2</i>     | <i>Srebf1</i> | <i>Oip5-As1</i>  | <i>Gabpb1-As1</i> | <i>Anxa5</i>    | <i>Acvr1B</i>  | <i>Snrpf</i>    | <i>Asxl1</i>   | <i>Duox2</i>  | <i>Kdm6B</i>  | <i>Fzd7</i>     |
| <i>Linc00336</i> | <i>Fus</i>    | <i>Mir3200</i>   | <i>Asmtl-As1</i>  | <i>Atp6V1E1</i> | <i>Eif4A1</i>  | <i>Tbc1D5</i>   | <i>Cbx5</i>    | <i>G6Pd</i>   | <i>Ccdc6</i>  | <i>Rps3</i>     |
| <i>Cbslr</i>     | <i>Hamp</i>   | <i>Linc00616</i> | <i>Ogfrp1</i>     | <i>Ctsz</i>     | <i>Gnb3</i>    | <i>Ythdf3</i>   | <i>Diaph3</i>  | <i>Pgd</i>    | <i>Src</i>    | <i>Dpysl2</i>   |
| <i>Bach1</i>     | <i>Psen1</i>  | <i>Mir1287</i>   | <i>C8Orf76</i>    | <i>Lgals3</i>   | <i>Hsp90B1</i> | <i>Pcbp3</i>    | <i>Gucy1A1</i> | <i>Nras</i>   | <i>Pml</i>    | <i>Rtl1</i>     |
| <i>Nedd4L</i>    | <i>Ahcy</i>   | <i>Esr1</i>      | <i>Sqstm1</i>     | <i>Gnb1</i>     | <i>Ldhb</i>    | <i>Rpl36A</i>   | <i>Myo9B</i>   | <i>Hras</i>   | <i>Tp63</i>   | <i>Hat1</i>     |
| <i>Emp1</i>      | <i>Ggt1</i>   | <i>Ep300</i>     | <i>Notch2</i>     | <i>Prkcsh</i>   | <i>Rpsa</i>    | <i>Snrpc</i>    | <i>Spi1</i>    | <i>Aloxe3</i> | <i>Cdkn1A</i> | <i>Tafazzin</i> |
| <i>Ythdf2</i>    | <i>Sirt1</i>  | <i>Creb1</i>     | <i>Trpv4</i>      | <i>Anp32A</i>   | <i>Smc3</i>    | <i>Actbl2</i>   | <i>Ahcyl1</i>  | <i>Mapk3</i>  | <i>Iscu</i>   |                 |
| <i>Socs1</i>     | <i>Sparc</i>  | <i>Kdm5C</i>     | <i>Tyro3</i>      | <i>Cars1</i>    | <i>Ywhab</i>   | <i>Rufy3</i>    | <i>Arcn1</i>   | <i>Zeb1</i>   | <i>Brd4</i>   |                 |
| <i>Prnp</i>      | <i>Gpd2</i>   | <i>Pebp1</i>     | <i>Atf6</i>       | <i>Eef1A1</i>   | <i>Atp5F1A</i> | <i>Tex264</i>   | <i>Bnip3L</i>  | <i>Cdo1</i>   | <i>Rrm2</i>   |                 |
| <i>Hells</i>     | <i>Mat2A</i>  | <i>Tfap2A</i>    | <i>Ca9</i>        | <i>Krt16</i>    | <i>Cfl1</i>    | <i>Abraxas2</i> | <i>Copa</i>    | <i>Myb</i>    | <i>Nr4A1</i>  |                 |
| <i>Eno1</i>      | <i>Mycn</i>   | <i>Ddb1</i>      | <i>Fpr2</i>       | <i>Krt19</i>    | <i>Dlst</i>    | <i>Igkc</i>     | <i>Eftud2</i>  | <i>Abcc1</i>  | <i>Pik3Ca</i> |                 |

---

**Supplementary Table 2.** The 771 Immune-related genes.

| Immune-related genes |                |                 |               |                |                |                |                |               |                |                |
|----------------------|----------------|-----------------|---------------|----------------|----------------|----------------|----------------|---------------|----------------|----------------|
| <i>Rag2</i>          | <i>Il23R</i>   | <i>Ercc1</i>    | <i>Foxo3</i>  | <i>Acadvl</i>  | <i>Ccdc22</i>  | <i>Ifnw1</i>   | <i>Phf14</i>   | <i>Lat</i>    | <i>En2</i>     | <i>Cep162</i>  |
| <i>Foxp3</i>         | <i>Il18R1</i>  | <i>Ar</i>       | <i>Igf2R</i>  | <i>Pcgf2</i>   | <i>Sptb</i>    | <i>Rcan2</i>   | <i>Zyx</i>     | <i>Dock2</i>  | <i>Golim4</i>  | <i>Nbn</i>     |
| <i>Il10</i>          | <i>Hspd1</i>   | <i>Muc1</i>     | <i>Ccl27</i>  | <i>Prkaa1</i>  | <i>Myh11</i>   | <i>Tagln</i>   | <i>Rs1</i>     | <i>Pla2G6</i> | <i>Vrk2</i>    | <i>Cd84</i>    |
| <i>Plcg2</i>         | <i>Slamf1</i>  | <i>Ube2L3</i>   | <i>Exo1</i>   | <i>Ptpro</i>   | <i>Pax2</i>    | <i>Igfbp6</i>  | <i>Reep5</i>   | <i>Swap70</i> | <i>Zscan26</i> | <i>Cd300A</i>  |
| <i>Ifng</i>          | <i>Clec4D</i>  | <i>Lgals9</i>   | <i>Atrx</i>   | <i>Lpp</i>     | <i>Psg4</i>    | <i>Atxn3</i>   | <i>Dmac2L</i>  | <i>Oprk1</i>  | <i>Rhoq</i>    | <i>Map2K6</i>  |
| <i>Syk</i>           | <i>Pglyrp1</i> | <i>Spi1</i>     | <i>Sh2D1B</i> | <i>Hbz</i>     | <i>Ddr2</i>    | <i>H4C9</i>    | <i>Emx2</i>    | <i>Golga2</i> | <i>Cep170B</i> | <i>Clcf1</i>   |
| <i>Stat1</i>         | <i>Ripk2</i>   | <i>Kit</i>      | <i>Sdc1</i>   | <i>Apbb1lp</i> | <i>Col11A1</i> | <i>Per2</i>    | <i>Snx6</i>    | <i>Mfng</i>   | <i>Spg7</i>    | <i>Mgrn1</i>   |
| <i>Il6</i>           | <i>Stat6</i>   | <i>Atg5</i>     | <i>Cxcl6</i>  | <i>Uba7</i>    | <i>Ift20</i>   | <i>Mboat7</i>  | <i>Tulp3</i>   | <i>Fgf13</i>  | <i>Has2</i>    | <i>Sec16A</i>  |
| <i>Myd88</i>         | <i>Spp1</i>    | <i>Klrc2</i>    | <i>Ifnk</i>   | <i>Asph</i>    | <i>Lmo7</i>    | <i>Zbtb7B</i>  | <i>Serpib7</i> | <i>Jun</i>    | <i>Nktr</i>    | <i>Nfib</i>    |
| <i>Il2</i>           | <i>Bcl6</i>    | <i>Fgfr1</i>    | <i>Cdr1</i>   | <i>Zfpm1</i>   | <i>Adamts2</i> | <i>Mocs3</i>   | <i>Magea12</i> | <i>Tjp1</i>   | <i>Rbm15B</i>  | <i>Rabgef1</i> |
| <i>Hla-Drb1</i>      | <i>Il23A</i>   | <i>Prkce</i>    | <i>Manba</i>  | <i>Lmod1</i>   | <i>Pnoc</i>    | <i>Erlin2</i>  | <i>Yipf3</i>   | <i>Rora</i>   | <i>Sri</i>     | <i>Tcta</i>    |
| <i>Tlr4</i>          | <i>Hmox1</i>   | <i>Cbl</i>      | <i>Nmi</i>    | <i>Lat2</i>    | <i>Six1</i>    | <i>Taf1</i>    | <i>Mta1</i>    | <i>Mdk</i>    | <i>S100A13</i> | <i>Il6R</i>    |
| <i>Ada</i>           | <i>Slc11A1</i> | <i>Oca2</i>     | <i>Idua</i>   | <i>Enpp2</i>   | <i>Col6A1</i>  | <i>Loxl2</i>   | <i>Aldh6A1</i> | <i>Sh3Bp2</i> | <i>Ndufa6</i>  | <i>Ccl19</i>   |
| <i>Pik3Cd</i>        | <i>Dnase1</i>  | <i>Mdfic</i>    | <i>Lcp1</i>   | <i>Rnf19B</i>  | <i>Crhr2</i>   | <i>Tmem109</i> | <i>Stxbp3</i>  | <i>Cpsf6</i>  | <i>Dlgap1</i>  | <i>Ifna16</i>  |
| <i>Cd19</i>          | <i>Psmb8</i>   | <i>Dnase1L3</i> | <i>Gpr183</i> | <i>Epb42</i>   | <i>Csh1</i>    | <i>Sulf1</i>   | <i>Tbc1D9B</i> | <i>Nek7</i>   | <i>Tspan31</i> | <i>Pip</i>     |

|               |                |                |                |               |                |                |                |               |                |                 |
|---------------|----------------|----------------|----------------|---------------|----------------|----------------|----------------|---------------|----------------|-----------------|
| <i>Il4</i>    | <i>Rasgrp1</i> | <i>Pou2Af1</i> | <i>Dll1</i>    | <i>Lhcgr</i>  | <i>Pyy</i>     | <i>Epas1</i>   | <i>Atp2C2</i>  | <i>Paxip1</i> | <i>Atg13</i>   | <i>Siglec6</i>  |
| <i>Cd40Lg</i> | <i>Dpp4</i>    | <i>Gata1</i>   | <i>Anxa2</i>   | <i>Pon1</i>   | <i>Exosc3</i>  | <i>Nek1</i>    | <i>Ptp4A1</i>  | <i>Ticam1</i> | <i>Rbpms</i>   | <i>Csrp2</i>    |
| <i>Jak3</i>   | <i>Camp</i>    | <i>Cd74</i>    | <i>Eif2Ak4</i> | <i>Myl9</i>   | <i>Nr4A3</i>   | <i>Ghrhr</i>   | <i>Riox2</i>   | <i>Chek2</i>  | <i>Atad5</i>   | <i>Klhl9</i>    |
| <i>Cd40</i>   | <i>Mapk14</i>  | <i>Ifi35</i>   | <i>Nfatc4</i>  | <i>Acp3</i>   | <i>Pvalb</i>   | <i>Ssx2</i>    | <i>Nkg7</i>    | <i>Mmp3</i>   | <i>Prrg2</i>   | <i>Acacb</i>    |
| <i>Il13</i>   | <i>Aicda</i>   | <i>Nr1H3</i>   | <i>C8G</i>     | <i>Ntrk2</i>  | <i>Col6A2</i>  | <i>Vapb</i>    | <i>Loxl3</i>   | <i>Atp7A</i>  | <i>Ptpn21</i>  | <i>Serpib10</i> |
| <i>Stat3</i>  | <i>Cd244</i>   | <i>Ngf</i>     | <i>Ighv1-2</i> | <i>Bscl2</i>  | <i>Myf5</i>    | <i>Mical2</i>  | <i>Pir</i>     | <i>Ly6E</i>   | <i>Itm2A</i>   | <i>Ttc30A</i>   |
| <i>Cd81</i>   | <i>Lilrb1</i>  | <i>Ly9</i>     | <i>Cd177</i>   | <i>Bche</i>   | <i>Rom1</i>    | <i>Rnh1</i>    | <i>Fads3</i>   | <i>Ros1</i>   | <i>Tox4</i>    | <i>Nlrp3</i>    |
| <i>Tgfb1</i>  | <i>Tnfsf4</i>  | <i>Lgals1</i>  | <i>Rfx1</i>    | <i>Sbno2</i>  | <i>Limk2</i>   | <i>Matn2</i>   | <i>Bicral</i>  | <i>Thoc1</i>  | <i>Slc7A1</i>  | <i>Tcf3</i>     |
| <i>Tp53</i>   | <i>Ifna2</i>   | <i>Psen1</i>   | <i>Nck1</i>    | <i>Alms1</i>  | <i>Gcdh</i>    | <i>Ucp3</i>    | <i>Dtna</i>    | <i>Gabra1</i> | <i>Emp3</i>    | <i>Cavin1</i>   |
| <i>Ptpn11</i> | <i>Relb</i>    | <i>Cd180</i>   | <i>Xrcc1</i>   | <i>Fer</i>    | <i>Xylt1</i>   | <i>Nisch</i>   | <i>H2Ac16</i>  | <i>Vdr</i>    | <i>Aox1</i>    | <i>Enpp1</i>    |
| <i>Hmgb1</i>  | <i>Il33</i>    | <i>Ifna6</i>   | <i>Krt5</i>    | <i>Vamp8</i>  | <i>Exosc6</i>  | <i>Slco2A1</i> | <i>Pck1</i>    | <i>Nsd2</i>   | <i>Slc16A7</i> | <i>Cracr2A</i>  |
| <i>Tyrobp</i> | <i>Fn1</i>     | <i>Ifna8</i>   | <i>Ifne</i>    | <i>Ptgdr</i>  | <i>Ptgds</i>   | <i>Nkx2-3</i>  | <i>Dyrk2</i>   | <i>Gja1</i>   | <i>Vps39</i>   | <i>Adgre2</i>   |
| <i>Fcgr2B</i> | <i>Lyn</i>     | <i>Ifna13</i>  | <i>Pdpc1</i>   | <i>Znf683</i> | <i>Dok1</i>    | <i>Bckdk</i>   | <i>Mt1G</i>    | <i>Fcmr</i>   | <i>Lims1</i>   | <i>Rab5B</i>    |
| <i>Ifna1</i>  | <i>Cxcr2</i>   | <i>App</i>     | <i>Dgcr6</i>   | <i>Grp</i>    | <i>Zfp36L2</i> | <i>Ap4M1</i>   | <i>Pcsk7</i>   | <i>Ptprd</i>  | <i>Thbs3</i>   | <i>Magea10</i>  |
| <i>Cd86</i>   | <i>Nckap1L</i> | <i>Ifna14</i>  | <i>Junb</i>    | <i>Fes</i>    | <i>Rc3H2</i>   | <i>Pram1</i>   | <i>Iqsec3</i>  | <i>Anxa3</i>  | <i>Tmem98</i>  | <i>Eea1</i>     |
| <i>Ccl3</i>   | <i>Hla-Dra</i> | <i>Ifnl1</i>   | <i>Rnf168</i>  | <i>Ube2l</i>  | <i>Rras2</i>   | <i>Entpd7</i>  | <i>Olfml2A</i> | <i>Znrf4</i>  | <i>Sanbr</i>   | <i>Hmces</i>    |
| <i>Rc3H1</i>  | <i>Ccr2</i>    | <i>Lilra2</i>  | <i>Stx4</i>    | <i>Dysf</i>   | <i>Tspan6</i>  | <i>Fkbp8</i>   | <i>Npipb3</i>  | <i>Praf2</i>  | <i>Stk17A</i>  | <i>Rab27A</i>   |



|                |                |                |                |               |                |                |                  |                 |                |                 |
|----------------|----------------|----------------|----------------|---------------|----------------|----------------|------------------|-----------------|----------------|-----------------|
| <i>Ccr6</i>    | <i>Kars1</i>   | <i>Hspa4</i>   | <i>Pik3R3</i>  | <i>Plcd1</i>  | <i>Man2B2</i>  | <i>Map2K5</i>  | <i>Rnf10</i>     | <i>Gata3</i>    | <i>Chml</i>    | <i>Hla-F</i>    |
| <i>Hras</i>    | <i>Lbp</i>     | <i>Ifna5</i>   | <i>Ifitm2</i>  | <i>Insl3</i>  | <i>Cacna1A</i> | <i>Map1B</i>   | <i>Hoxd3</i>     | <i>Prkcz</i>    | <i>Hmbs</i>    | <i>Rara</i>     |
| <i>Sh2D1A</i>  | <i>Ipo8</i>    | <i>Hla-Dmb</i> | <i>Ifna10</i>  | <i>Enpp3</i>  | <i>Plcl2</i>   | <i>Cdc40</i>   | <i>Rab3B</i>     | <i>Lgals3Bp</i> | <i>Cel</i>     | <i>C17Orf99</i> |
| <i>Cd28</i>    | <i>Coro1A</i>  | <i>Msh2</i>    | <i>Smad7</i>   | <i>Vamp3</i>  | <i>Mybpc3</i>  | <i>Sucnr1</i>  | <i>Adcyap1R1</i> | <i>Ccl23</i>    | <i>Crabp2</i>  | <i>Mtr</i>      |
| <i>Ptprc</i>   | <i>Bcr</i>     | <i>Fpr2</i>    | <i>Ache</i>    | <i>Muc6</i>   | <i>Stxbp1</i>  | <i>Ctbs</i>    | <i>Efemp1</i>    | <i>Ank1</i>     | <i>Itpka</i>   | <i>Tmco6</i>    |
| <i>IL12Rb1</i> | <i>ErbB2</i>   | <i>FcER1G</i>  | <i>Msh6</i>    | <i>Gzmk</i>   | <i>Actr1B</i>  | <i>Add1</i>    | <i>Celf2</i>     | <i>Sdc2</i>     | <i>Mas1</i>    | <i>Mln</i>      |
| <i>IL18</i>    | <i>Socs3</i>   | <i>Cd1C</i>    | <i>Adora2B</i> | <i>Fads1</i>  | <i>Tep1</i>    | <i>Mmp16</i>   | <i>Igfbp4</i>    | <i>Cdh17</i>    | <i>Slc16A5</i> | <i>Ppp2R3A</i>  |
| <i>Ifnb1</i>   | <i>Trem2</i>   | <i>C3Ar1</i>   | <i>Gab2</i>    | <i>Cubn</i>   | <i>Fbln5</i>   | <i>Slc12A1</i> | <i>Pdia5</i>     | <i>Shld3</i>    | <i>Or2H2</i>   | <i>Rasgrp2</i>  |
| <i>Irf8</i>    | <i>Mtor</i>    | <i>Sema4A</i>  | <i>Gri</i>     | <i>Kmt5B</i>  | <i>Shb</i>     | <i>Svep1</i>   | <i>Farp2</i>     | <i>Cr1</i>      | <i>Zfp1</i>    | <i>Sned1</i>    |
| <i>Itgb2</i>   | <i>Calr</i>    | <i>Pglyrp2</i> | <i>Rnf8</i>    | <i>Fap</i>    | <i>Dctn1</i>   | <i>Ccdc85B</i> | <i>Nmnat2</i>    | <i>Ptk2B</i>    | <i>Dmxi1</i>   | <i>Itgal</i>    |
| <i>Fcgr3A</i>  | <i>IL27</i>    | <i>Plaur</i>   | <i>Tp53Bp1</i> | <i>Prkd3</i>  | <i>Rps6</i>    | <i>Trio</i>    | <i>Cby1</i>      | <i>Ptafr</i>    | <i>Brsk2</i>   | <i>Ptpn6</i>    |
| <i>Havcr2</i>  | <i>Itga4</i>   | <i>Fgr</i>     | <i>Zfx3</i>    | <i>Lama2</i>  | <i>Fads2</i>   | <i>Ttn-As1</i> | <i>Gabpb1</i>    | <i>Ube3A</i>    | <i>Gjc1</i>    | <i>Ptgdr2</i>   |
| <i>IL4R</i>    | <i>Spn</i>     | <i>Ncr1</i>    | <i>Itga3</i>   | <i>Hyal1</i>  | <i>Igfbp5</i>  | <i>Rai14</i>   | <i>Btd2</i>      | <i>Igfbp3</i>   | <i>Pkmyt1</i>  | <i>Foxp1</i>    |
| <i>IL21</i>    | <i>Ung</i>     | <i>Zc3H12A</i> | <i>Dusp1</i>   | <i>Gapt</i>   | <i>Map2</i>    | <i>Psg3</i>    | <i>Clnk</i>      | <i>Tbcd</i>     | <i>Capns1</i>  | <i>Slc6A3</i>   |
| <i>Btk</i>     | <i>Abl1</i>    | <i>Ifna17</i>  | <i>Clca1</i>   | <i>Scnn1B</i> | <i>Inhba</i>   | <i>Shld1</i>   | <i>C12Orf4</i>   | <i>Ptgir</i>    | <i>Moxd1</i>   | <i>Nap1L1</i>   |
| <i>Cxcl12</i>  | <i>Ceacam1</i> | <i>Plp1</i>    | <i>Plxnc1</i>  | <i>Postn</i>  | <i>Tgfb1</i>   | <i>Atp2C1</i>  | <i>Itfg2</i>     | <i>Runx1T1</i>  | <i>Supt6H</i>  | <i>Esm1</i>     |
| <i>IL12B</i>   | <i>Cacna1C</i> | <i>Flna</i>    | <i>Gale</i>    | <i>PscA</i>   | <i>Saa4</i>    | <i>Ltbp2</i>   | <i>Milr1</i>     | <i>Tbx21</i>    | <i>Fam168B</i> | <i>Shld2</i>    |

|               |                |                |                 |                 |                |                |                |                |                 |                |
|---------------|----------------|----------------|-----------------|-----------------|----------------|----------------|----------------|----------------|-----------------|----------------|
| <i>Lig4</i>   | <i>Clec4E</i>  | <i>Akt3</i>    | <i>Lfng</i>     | <i>Nfkbiz</i>   | <i>Hnrnpu</i>  | <i>Sgcd</i>    | <i>C1Orf21</i> | <i>Cxcl13</i>  | <i>Snx4</i>     | <i>Ptger4</i>  |
| <i>Cd80</i>   | <i>Hbb</i>     | <i>Pms2</i>    | <i>Traf3lp3</i> | <i>St3Gal1</i>  | <i>Mrgprx2</i> | <i>Thbs2</i>   | <i>Nfkbid</i>  | <i>Notch2</i>  | <i>Zscan12</i>  | <i>Ppp6R2</i>  |
| <i>Cx3Cr1</i> | <i>Pparg</i>   | <i>Mapk11</i>  | <i>Lef1</i>     | <i>Serpinh1</i> | <i>Rnf41</i>   | <i>Kcnk3</i>   | <i>Gdf10</i>   | <i>Cd151</i>   | <i>Prr3</i>     | <i>Ccnd1</i>   |
| <i>Trex1</i>  | <i>Masp1</i>   | <i>Eomes</i>   | <i>Chga</i>     | <i>Fer1L5</i>   | <i>Pbx1</i>    | <i>Maz</i>     | <i>Msc</i>     | <i>Mad2L2</i>  | <i>Rnf216P1</i> | <i>F2RI1</i>   |
| <i>Tfrc</i>   | <i>Tnfsf13</i> | <i>Tsc1</i>    | <i>Lamc2</i>    | <i>Sphk2</i>    | <i>Foxf1</i>   | <i>Sspn</i>    | <i>Rer1</i>    | <i>Pdgfrl</i>  | <i>Acy1</i>     | <i>Tnfsf18</i> |
| <i>Malt1</i>  | <i>Anxa1</i>   | <i>Bcl3</i>    | <i>Cd1E</i>     | <i>Agtr2</i>    | <i>Ap1G1</i>   | <i>Klrf2</i>   | <i>Gamt</i>    | <i>Dock10</i>  | <i>Mvd</i>      | <i>Lipa</i>    |
| <i>Cfh</i>    | <i>Slamf6</i>  | <i>Mlh1</i>    | <i>Jund</i>     | <i>Ndfip1</i>   | <i>Dync1I2</i> | <i>Rab2A</i>   | <i>Slc13A3</i> | <i>Hlx</i>     | <i>Arhgef11</i> | <i>Lpin1</i>   |
| <i>Tcim</i>   | <i>Gata2</i>   | <i>Il13Ra2</i> | <i>Zfp36</i>    | <i>Actg1</i>    | <i>Efemp2</i>  | <i>Etv1</i>    | <i>Mpg</i>     | <i>Tnfsf11</i> | <i>Cdh6</i>     | <i>Ptger1</i>  |
| <i>Irf4</i>   | <i>Flt3Lg</i>  | <i>Btn3A2</i>  | <i>Rad52</i>    | <i>Vamp2</i>    | <i>Kat6B</i>   | <i>Tgfb1I1</i> | <i>Rif1</i>    | <i>Pglyrp3</i> | <i>Cetn2</i>    | <i>Rpl23</i>   |
| <i>Itgam</i>  | <i>Blk</i>     | <i>Slc15A4</i> | <i>Lrp1</i>     | <i>Ddit3</i>    | <i>Folr2</i>   | <i>Lamb1</i>   | <i>Dock11</i>  | <i>Batf</i>    | <i>Dusp9</i>    | <i>Ca12</i>    |
| <i>Pik3Cg</i> | <i>Lgals3</i>  | <i>Xbp1</i>    | <i>Gfap</i>     | <i>Selenop</i>  | <i>Phf20</i>   | <i>Wscd1</i>   | <i>Rasa4</i>   | <i>Oprd1</i>   | <i>Dlgap4</i>   | <i>Dhfr</i>    |
| <i>Icam1</i>  | <i>Pycard</i>  | <i>Lamp1</i>   | <i>Fgl2</i>     | <i>Snap23</i>   | <i>Nfasc</i>   | <i>Abca4</i>   | <i>Ap1f</i>    | <i>Skap1</i>   | <i>Rap2A</i>    | <i>Nit1</i>    |
| <i>Rac2</i>   | <i>Hspg2</i>   | <i>Ifna21</i>  | <i>Sppl2B</i>   | <i>Tk2</i>      | <i>Tdrd3</i>   | <i>Gdf11</i>   | <i>Kmt5C</i>   | <i>Rab44</i>   | <i>Sgsm3</i>    |                |
| <i>Unc13D</i> | <i>Il27Ra</i>  | <i>Ifna4</i>   | <i>Myb</i>      | <i>Lox</i>      | <i>Eif2Ak1</i> | <i>Gbf1</i>    | <i>Glb1L2</i>  | <i>Tpm4</i>    | <i>Col16A1</i>  |                |
| <i>Cd46</i>   | <i>Rorc</i>    | <i>Ifna7</i>   | <i>Vamp7</i>    | <i>Pla2G3</i>   | <i>Chst3</i>   | <i>Abcb6</i>   | <i>Or1E1</i>   | <i>Prune2</i>  | <i>Shc2</i>     |                |
| <i>Stxbp2</i> | <i>Slc7A7</i>  | <i>Aprt</i>    | <i>Osmr</i>     | <i>Socs5</i>    | <i>Pax4</i>    | <i>Abca6</i>   | <i>Meis3P1</i> | <i>Mir21</i>   | <i>Frmpd4</i>   |                |

---

**Supplementary Table 3.** The 1500 Ferroptosis immune-related genes.

| Ferroptosis immune-related genes |                 |               |                |               |              |                  |                |                |                |                |
|----------------------------------|-----------------|---------------|----------------|---------------|--------------|------------------|----------------|----------------|----------------|----------------|
| <i>Hepfal</i>                    | <i>Cth</i>      | <i>Alas2</i>  | <i>Mir1231</i> | <i>Prdx2</i>  | <i>Vcp</i>   | <i>Agpat3</i>    | <i>Trib2</i>   | <i>Itga4</i>   | <i>Dgcr6</i>   | <i>Ptprd</i>   |
| <i>Aifm2</i>                     | <i>Cybb</i>     | <i>Ccl5</i>   | <i>Mir3938</i> | <i>Vapb</i>   | <i>Cad</i>   | <i>Pex12</i>     | <i>Ptpn18</i>  | <i>Spn</i>     | <i>Junb</i>    | <i>Ly6E</i>    |
| <i>Gpx4</i>                      | <i>Slc11A2</i>  | <i>Cul4A</i>  | <i>Itga6</i>   | <i>Ywhaz</i>  | <i>Foxo1</i> | <i>Chp1</i>      | <i>Klhdc3</i>  | <i>Ung</i>     | <i>Rnf168</i>  | <i>Sh3Bp2</i>  |
| <i>Slc7A11</i>                   | <i>Gch1</i>     | <i>Ngly1</i>  | <i>Prkaa2</i>  | <i>Actc1</i>  | <i>Gnas</i>  | <i>Gpat4</i>     | <i>Gstm1</i>   | <i>Abl1</i>    | <i>Stx4</i>    | <i>Oprk1</i>   |
| <i>Nfe2L2</i>                    | <i>Gss</i>      | <i>Rbx1</i>   | <i>Cd44</i>    | <i>Cct5</i>   | <i>Cps1</i>  | <i>Brpf1</i>     | <i>Rarres2</i> | <i>Ceacam1</i> | <i>Pik3R3</i>  | <i>Ccdc22</i>  |
| <i>Tp53</i>                      | <i>Hmgcr</i>    | <i>Cul4B</i>  | <i>Fancd2</i>  | <i>Ckb</i>    | <i>Eef2</i>  | <i>Osbp19</i>    | <i>Arntl</i>   | <i>Cacna1C</i> | <i>Ifitm2</i>  | <i>Sptb</i>    |
| <i>Acsl4</i>                     | <i>Phkg2</i>    | <i>H1-4</i>   | <i>Alox12</i>  | <i>Ewsr1</i>  | <i>Grn</i>   | <i>Ints2</i>     | <i>Tmbim4</i>  | <i>Clec4E</i>  | <i>Ache</i>    | <i>Myh11</i>   |
| <i>Tfrc</i>                      | <i>Slc39A8</i>  | <i>Nfe2L1</i> | <i>Nqo1</i>    | <i>Pdia3</i>  | <i>Mif</i>   | <i>Mmd</i>       | <i>Slc16A1</i> | <i>Hbb</i>     | <i>Msh6</i>    | <i>Pax2</i>    |
| <i>Ncoa4</i>                     | <i>Slc39A14</i> | <i>Setdb1</i> | <i>Mapk1</i>   | <i>Trim28</i> | <i>Muc1</i>  | <i>Cyp4F8</i>    | <i>Fndc5</i>   | <i>Pparg</i>   | <i>Adora2B</i> | <i>Psg4</i>    |
| <i>Hmox1</i>                     | <i>Nox1</i>     | <i>Pdss2</i>  | <i>Myc</i>     | <i>Xrcc5</i>  | <i>Hadhb</i> | <i>Mllt1</i>     | <i>Glrx5</i>   | <i>Masp1</i>   | <i>Gab2</i>    | <i>Col11A1</i> |
| <i>Slc40A1</i>                   | <i>Acsl5</i>    | <i>Cyb5R1</i> | <i>Ldha</i>    | <i>Dut</i>    | <i>Fhl2</i>  | <i>Ttpa</i>      | <i>Furin</i>   | <i>Tnfsf13</i> | <i>Rnf8</i>    | <i>Ift20</i>   |
| <i>Slc3A2</i>                    | <i>Gclm</i>     | <i>H1-5</i>   | <i>Pcna</i>    | <i>Prok2</i>  | <i>Hcfc1</i> | <i>Gria3</i>     | <i>Tmsb4X</i>  | <i>Slamf6</i>  | <i>Tp53Bp1</i> | <i>Lmo7</i>    |
| <i>Vdac3</i>                     | <i>Slc38A1</i>  | <i>Sema5A</i> | <i>Actb</i>    | <i>Ptbp1</i>  | <i>Htr1D</i> | <i>Pom121L12</i> | <i>Tmsb4Y</i>  | <i>Gata2</i>   | <i>Zfhx3</i>   | <i>Adamts2</i> |
| <i>Alox15</i>                    | <i>Acsl6</i>    | <i>Abcb10</i> | <i>Alb</i>     | <i>Rpa2</i>   | <i>Abca4</i> | <i>Aebp2</i>     | <i>Rag2</i>    | <i>Flt3Lg</i>  | <i>Itga3</i>   | <i>Pnoc</i>    |
| <i>Cbs</i>                       | <i>Chmp5</i>    | <i>H1-2</i>   | <i>Egln1</i>   | <i>Rpl10</i>  | <i>Huwe1</i> | <i>Agps</i>      | <i>Foxp3</i>   | <i>Blk</i>     | <i>Dusp1</i>   | <i>Six1</i>    |

|                 |                  |                  |                 |                |                |               |                 |                |                 |                |
|-----------------|------------------|------------------|-----------------|----------------|----------------|---------------|-----------------|----------------|-----------------|----------------|
| <i>Ireb2</i>    | <i>Coq2</i>      | <i>Cygb</i>      | <i>Hspa8</i>    | <i>Rpl15</i>   | <i>Kpna2</i>   | <i>Cdca3</i>  | <i>Il10</i>     | <i>Pycard</i>  | <i>Clca1</i>    | <i>Col6A1</i>  |
| <i>Becn1</i>    | <i>Sat2</i>      | <i>Dcaf8</i>     | <i>Krt18</i>    | <i>Atp5F1B</i> | <i>Rps6Kb2</i> | <i>Pex2</i>   | <i>Plcg2</i>    | <i>Hspg2</i>   | <i>Plxnc1</i>   | <i>Crhr2</i>   |
| <i>Akr1C1</i>   | <i>Chmp6</i>     | <i>H1-1</i>      | <i>Anxa2</i>    | <i>Banf1</i>   | <i>Ruvbl2</i>  | <i>Pex6</i>   | <i>Syk</i>      | <i>Il27Ra</i>  | <i>Gale</i>     | <i>Csh1</i>    |
| <i>Hspb1</i>    | <i>Grik1-As2</i> | <i>H1-3</i>      | <i>Map3K5</i>   | <i>Cnbp</i>    | <i>Sf3B1</i>   | <i>Timm9</i>  | <i>Stat1</i>    | <i>Rorc</i>    | <i>Lfng</i>     | <i>Pyy</i>     |
| <i>Fth1</i>     | <i>Idh1</i>      | <i>Paqr3</i>     | <i>Mdh2</i>     | <i>Itih3</i>   | <i>C1Qbp</i>   | <i>Dcaf7</i>  | <i>Myd88</i>    | <i>Slc7A7</i>  | <i>Traf3Ip3</i> | <i>Exosc3</i>  |
| <i>Por</i>      | <i>Pten</i>      | <i>Ufl1</i>      | <i>Tpm1</i>     | <i>Lrp1</i>    | <i>Copb2</i>   | <i>Lce2C</i>  | <i>Il2</i>      | <i>F2RI1</i>   | <i>Lef1</i>     | <i>Nr4A3</i>   |
| <i>Pcbp1</i>    | <i>Gja1</i>      | <i>Commd10</i>   | <i>Hif1A</i>    | <i>Rpl26</i>   | <i>Ogt</i>     | <i>Far1</i>   | <i>Hla-Drb1</i> | <i>Hla-F</i>   | <i>Chga</i>     | <i>Pvalb</i>   |
| <i>Atg7</i>     | <i>Gsk3B</i>     | <i>Wdr76</i>     | <i>Fh</i>       | <i>Dhx9</i>    | <i>Polr2B</i>  | <i>Phf21A</i> | <i>Ada</i>      | <i>Tcf3</i>    | <i>Lamc2</i>    | <i>Col6A2</i>  |
| <i>Yap1</i>     | <i>Prdx1</i>     | <i>H1-10</i>     | <i>Krt14</i>    | <i>Pdia4</i>   | <i>Prmt7</i>   | <i>Smad7</i>  | <i>Pik3Cd</i>   | <i>Ccl19</i>   | <i>Cd1E</i>     | <i>Myf5</i>    |
| <i>Ftmt</i>     | <i>Cav1</i>      | <i>Mir326</i>    | <i>Phb1</i>     | <i>Rpl13A</i>  | <i>Rbbp4</i>   | <i>Lym1</i>   | <i>Cd19</i>     | <i>Cd84</i>    | <i>Jund</i>     | <i>Rom1</i>    |
| <i>Acsf3</i>    | <i>Prkcb</i>     | <i>Mir324</i>    | <i>Tpm3</i>     | <i>Rplp0</i>   | <i>Rps10</i>   | <i>Amn</i>    | <i>Il4</i>      | <i>Dhfr</i>    | <i>Rad52</i>    | <i>Limk2</i>   |
| <i>Map1Lc3B</i> | <i>Sreb1</i>     | <i>Zfas1</i>     | <i>Anxa5</i>    | <i>Rps13</i>   | <i>Asx1</i>    | <i>Pex3</i>   | <i>Cd40Lg</i>   | <i>Pglyrp3</i> | <i>Lrp1</i>     | <i>Gcdh</i>    |
| <i>Sat1</i>     | <i>Fus</i>       | <i>Mir19A</i>    | <i>Atp6V1E1</i> | <i>Rps7</i>    | <i>Cbx5</i>    | <i>Mtch1</i>  | <i>Jak3</i>     | <i>Cxcl13</i>  | <i>Gfap</i>     | <i>Xylt1</i>   |
| <i>Otub1</i>    | <i>Hamp</i>      | <i>Linc00239</i> | <i>Ctsz</i>     | <i>Vapa</i>    | <i>Diaph3</i>  | <i>Mapk8</i>  | <i>Cd40</i>     | <i>Ptk2B</i>   | <i>Fgl2</i>     | <i>Exosc6</i>  |
| <i>Cp</i>       | <i>Psen1</i>     | <i>Lastr</i>     | <i>Lgals3</i>   | <i>Cct4</i>    | <i>Gucy1A1</i> | <i>Cgas</i>   | <i>Il13</i>     | <i>Prkcz</i>   | <i>Sppl2B</i>   | <i>Ptgds</i>   |
| <i>Cisd1</i>    | <i>Ahcy</i>      | <i>Mir4735</i>   | <i>Gnb1</i>     | <i>Cct6A</i>   | <i>Myo9B</i>   | <i>Prkca</i>  | <i>Cd81</i>     | <i>Nsd2</i>    | <i>Vamp7</i>    | <i>Dok1</i>    |
| <i>Map1Lc3C</i> | <i>Ggt1</i>      | <i>Ptgs2</i>     | <i>Prkcsh</i>   | <i>Cct8</i>    | <i>Spi1</i>    | <i>Ifng</i>   | <i>Ptpn11</i>   | <i>Tjp1</i>    | <i>Osmr</i>     | <i>Zfp36L2</i> |

|                 |               |                 |               |                |                |               |                |                 |                 |                |
|-----------------|---------------|-----------------|---------------|----------------|----------------|---------------|----------------|-----------------|-----------------|----------------|
| <i>Fbxw7</i>    | <i>Sirt1</i>  | <i>Alox5</i>    | <i>Anp32A</i> | <i>Hmgn1</i>   | <i>Ahcyl1</i>  | <i>Smpd1</i>  | <i>Tyrobp</i>  | <i>Dock2</i>    | <i>Lipa</i>     | <i>Rc3H2</i>   |
| <i>Slc1A5</i>   | <i>Sparc</i>  | <i>Nedd4</i>    | <i>Cars1</i>  | <i>Hnrnp1</i>  | <i>Arcn1</i>   | <i>Micu1</i>  | <i>Fcgr2B</i>  | <i>Ercc1</i>    | <i>Foxp1</i>    | <i>Rras2</i>   |
| <i>Akr1C2</i>   | <i>Gpd2</i>   | <i>Abcb6</i>    | <i>Eef1A1</i> | <i>Hnrnpm</i>  | <i>Bnip3L</i>  | <i>Tor2A</i>  | <i>Cd86</i>    | <i>Ube2L3</i>   | <i>C17Orf99</i> | <i>Tspan6</i>  |
| <i>Akr1C3</i>   | <i>Mat2A</i>  | <i>Fxn</i>      | <i>Krt16</i>  | <i>Khdrbs1</i> | <i>Copa</i>    | <i>Cltn</i>   | <i>Ccl3</i>    | <i>Lgals9</i>   | <i>Enpp1</i>    | <i>Man2B2</i>  |
| <i>Steap3</i>   | <i>Mycn</i>   | <i>Ltf</i>      | <i>Krt19</i>  | <i>Map4</i>    | <i>Eftud2</i>  | <i>Trim46</i> | <i>Rc3H1</i>   | <i>Kit</i>      | <i>Pip</i>      | <i>Cacna1A</i> |
| <i>Pcbp2</i>    | <i>Usp14</i>  | <i>Pycr1</i>    | <i>Rps3</i>   | <i>Nolc1</i>   | <i>Hat1</i>    | <i>Kdm5A</i>  | <i>Ccr6</i>    | <i>Klrc2</i>    | <i>Map2K6</i>   | <i>Plcl2</i>   |
| <i>Atf4</i>     | <i>Foxc1</i>  | <i>Acadsb</i>   | <i>Rps6</i>   | <i>Plxna4</i>  | <i>Kpnb1</i>   | <i>Ndrp1</i>  | <i>Sh2D1A</i>  | <i>Fgfr1</i>    | <i>Rasgrp2</i>  | <i>Mybpc3</i>  |
| <i>Gclc</i>     | <i>Gls2</i>   | <i>Aco1</i>     | <i>Psm1</i>   | <i>Rpl34</i>   | <i>Msr3</i>    | <i>Ptpn6</i>  | <i>Cd28</i>    | <i>Prkce</i>    | <i>Oprd1</i>    | <i>Stxbp1</i>  |
| <i>Nox4</i>     | <i>Styk1</i>  | <i>Adipor1</i>  | <i>Anxa4</i>  | <i>Rplp2</i>   | <i>Polr2E</i>  | <i>Adam23</i> | <i>Ptprc</i>   | <i>Cbl</i>      | <i>Cd151</i>    | <i>Actr1B</i>  |
| <i>Vdac2</i>    | <i>Nkap</i>   | <i>Kdm4A</i>    | <i>Eif4H</i>  | <i>Snrpa</i>   | <i>Prpf8</i>   | <i>Cpeb1</i>  | <i>Il12Rb1</i> | <i>Oca2</i>     | <i>Ube3A</i>    | <i>Tep1</i>    |
| <i>Atg5</i>     | <i>Rbms1</i>  | <i>H2Ax</i>     | <i>Psm1</i>   | <i>Pdia6</i>   | <i>Rbbp7</i>   | <i>Mib1</i>   | <i>Il18</i>    | <i>Mdfic</i>    | <i>Ccl23</i>    | <i>Fbln5</i>   |
| <i>Park7</i>    | <i>Sesn2</i>  | <i>Jam3</i>     | <i>Rpl7A</i>  | <i>Pfn2</i>    | <i>Alox12B</i> | <i>Yy1Ap1</i> | <i>Ifnb1</i>   | <i>Dnase1L3</i> | <i>Fcmr</i>     | <i>Shb</i>     |
| <i>Map1Lc3A</i> | <i>Miox</i>   | <i>Yme1L1</i>   | <i>Rps2</i>   | <i>Rpl30</i>   | <i>Alox15B</i> | <i>Egln2</i>  | <i>Irf8</i>    | <i>Pou2Af1</i>  | <i>Atp7A</i>    | <i>Dctn1</i>   |
| <i>Wwtr1</i>    | <i>Pir</i>    | <i>Etv4</i>     | <i>Snap29</i> | <i>Snrpd2</i>  | <i>Ano6</i>    | <i>Mtdh</i>   | <i>Itgb2</i>   | <i>Gata1</i>    | <i>Mdk</i>      | <i>Igfbp5</i>  |
| <i>Prdx6</i>    | <i>Pvt1</i>   | <i>Slc25A10</i> | <i>Cltb</i>   | <i>Snu13</i>   | <i>Cisd2</i>   | <i>Il1B</i>   | <i>Fcgr3A</i>  | <i>Cd74</i>     | <i>Swap70</i>   | <i>Map2</i>    |
| <i>Prkaa1</i>   | <i>Mir362</i> | <i>Plin2</i>    | <i>Krt6B</i>  | <i>Ybx1</i>    | <i>Copb1</i>   | <i>Pex10</i>  | <i>Havcr2</i>  | <i>Ifi35</i>    | <i>Acadv1</i>   | <i>Inhba</i>   |
| <i>Acs1</i>     | <i>Mir670</i> | <i>Rhot1</i>    | <i>Psm1</i>   | <i>Fam120A</i> | <i>Eloc</i>    | <i>Lig3</i>   | <i>Il4R</i>    | <i>Nr1H3</i>    | <i>Pcgf2</i>    | <i>Tgfb1</i>   |

|                |                |                 |                |                 |                |                 |               |                |                |                |
|----------------|----------------|-----------------|----------------|-----------------|----------------|-----------------|---------------|----------------|----------------|----------------|
| <i>Mdm2</i>    | <i>Vdac1</i>   | <i>Csrp2</i>    | <i>Txn1l</i>   | <i>Naca</i>     | <i>Gpx2</i>    | <i>Brd7</i>     | <i>Il21</i>   | <i>Ngf</i>     | <i>Ptpro</i>   | <i>Saa4</i>    |
| <i>Lcn2</i>    | <i>Idh2</i>    | <i>Stoml2</i>   | <i>Myl12A</i>  | <i>Rps4X</i>    | <i>Rb1Cc1</i>  | <i>Slc25A28</i> | <i>Btk</i>    | <i>Ly9</i>     | <i>Lpp</i>     | <i>Hnrnpu</i>  |
| <i>Scd</i>     | <i>Nfkb1</i>   | <i>Cirbp</i>    | <i>Stom</i>    | <i>Alyref</i>   | <i>Rps12</i>   | <i>Tsc1</i>     | <i>Cxcl12</i> | <i>Lgals1</i>  | <i>Hbz</i>     | <i>Mrgprx2</i> |
| <i>Rela</i>    | <i>Kat5</i>    | <i>Dazap1</i>   | <i>Tpm4</i>    | <i>Hnrnpa3</i>  | <i>Rps23</i>   | <i>Ifna1</i>    | <i>Il12B</i>  | <i>Cd180</i>   | <i>Apbb1lp</i> | <i>Rnf41</i>   |
| <i>Tf</i>      | <i>Phgdh</i>   | <i>Mettl14</i>  | <i>Fkbp3</i>   | <i>Muc16</i>    | <i>Rps27A</i>  | <i>Ifna2</i>    | <i>Lig4</i>   | <i>App</i>     | <i>Uba7</i>    | <i>Pbx1</i>    |
| <i>Neat1</i>   | <i>Dld</i>     | <i>Bnc1</i>     | <i>Tpd52L2</i> | <i>Myl6B</i>    | <i>Sting1</i>  | <i>Ifna4</i>    | <i>Cd80</i>   | <i>Ifnl1</i>   | <i>Asph</i>    | <i>Foxf1</i>   |
| <i>Mir214</i>  | <i>Hnrnpa1</i> | <i>Gabpb1</i>   | <i>Anp32B</i>  | <i>Rufy1</i>    | <i>Tnpo1</i>   | <i>Ifna5</i>    | <i>Cx3Cr1</i> | <i>Lilra2</i>  | <i>Zfpm1</i>   | <i>Ap1G1</i>   |
| <i>Il6</i>     | <i>Jun</i>     | <i>C19Orf12</i> | <i>Decr2</i>   | <i>Slc25A31</i> | <i>Usp11</i>   | <i>Ifna6</i>    | <i>Trex1</i>  | <i>Hspa4</i>   | <i>Lmod1</i>   | <i>Dync112</i> |
| <i>Hmgb1</i>   | <i>Lifr</i>    | <i>Zscan25</i>  | <i>Dnajc9</i>  | <i>Snrpd1</i>   | <i>Aldh1L1</i> | <i>Ifna7</i>    | <i>Malt1</i>  | <i>Hla-Dmb</i> | <i>Lat2</i>    | <i>Efemp2</i>  |
| <i>Sirt3</i>   | <i>Stub1</i>   | <i>Alkbh5</i>   | <i>Trim26</i>  | <i>Usp44</i>    | <i>Bnip3</i>   | <i>Ifna8</i>    | <i>Cfh</i>    | <i>Msh2</i>    | <i>Enpp2</i>   | <i>Kat6B</i>   |
| <i>Sp1</i>     | <i>Mdm4</i>    | <i>Slirp</i>    | <i>Pym1</i>    | <i>Wbp11</i>    | <i>Copg1</i>   | <i>Ifna10</i>   | <i>Tcim</i>   | <i>Fcer1G</i>  | <i>Rnf19B</i>  | <i>Folr2</i>   |
| <i>Elavl1</i>  | <i>Sox2</i>    | <i>Scgb1D2</i>  | <i>Ccdc124</i> | <i>Wtap</i>     | <i>Dnaja1</i>  | <i>Ifna13</i>   | <i>Irf4</i>   | <i>Cd1C</i>    | <i>Epb42</i>   | <i>Phf20</i>   |
| <i>Tnfaip3</i> | <i>Dkk1</i>    | <i>Peds1</i>    | <i>Mir9-1</i>  | <i>Cntnap4</i>  | <i>Id1</i>     | <i>Ifna14</i>   | <i>Itgam</i>  | <i>C3Ar1</i>   | <i>Lhcgr</i>   | <i>Nfasc</i>   |
| <i>Panx1</i>   | <i>Ltbp2</i>   | <i>Tmed8</i>    | <i>Mir137</i>  | <i>Erh</i>      | <i>Maged2</i>  | <i>Ifna16</i>   | <i>Pik3Cg</i> | <i>Sema4A</i>  | <i>Pon1</i>    | <i>Tdrd3</i>   |
| <i>Atf3</i>    | <i>Snai2</i>   | <i>Mir127</i>   | <i>Chac1</i>   | <i>Ksr2</i>     | <i>Rbm10</i>   | <i>Ifna17</i>   | <i>Icam1</i>  | <i>Pglyrp2</i> | <i>Myl9</i>    | <i>Eif2Ak1</i> |
| <i>Keap1</i>   | <i>Bmal1</i>   | <i>Mir375</i>   | <i>Bex1</i>    | <i>Ngb</i>      | <i>Rps15</i>   | <i>Ifna21</i>   | <i>Rac2</i>   | <i>Plaur</i>   | <i>Acp3</i>    | <i>Chst3</i>   |
| <i>Kras</i>    | <i>Gstz1</i>   | <i>Mir106A</i>  | <i>Nfs1</i>    | <i>Rpl38</i>    | <i>Ube2O</i>   | <i>Piezo1</i>   | <i>Unc13D</i> | <i>Fgr</i>     | <i>Ntrk2</i>   | <i>Pax4</i>    |

|                  |                    |                   |                  |                 |                |                |                |                |               |                  |
|------------------|--------------------|-------------------|------------------|-----------------|----------------|----------------|----------------|----------------|---------------|------------------|
| <i>Prom2</i>     | <i>Gpx3</i>        | <i>Gabpb1-As1</i> | <i>Cdh2</i>      | <i>Snrpf</i>    | <i>Aldh1L2</i> | <i>Kdm6B</i>   | <i>Cd46</i>    | <i>Ncr1</i>    | <i>Bscl2</i>  | <i>Ptger1</i>    |
| <i>Linc00336</i> | <i>Hcar1</i>       | <i>Asmtl-As1</i>  | <i>Epas1</i>     | <i>Tbc1D5</i>   | <i>Dnaja2</i>  | <i>Ccdc6</i>   | <i>Stxbp2</i>  | <i>Zc3H12A</i> | <i>Bche</i>   | <i>Tmco6</i>     |
| <i>Cbslr</i>     | <i>Retreg1</i>     | <i>Ogfrp1</i>     | <i>Hpcal1</i>    | <i>Ythdf3</i>   | <i>Fat1</i>    | <i>Src</i>     | <i>Ccnd1</i>   | <i>Plp1</i>    | <i>Sbno2</i>  | <i>Adgre2</i>    |
| <i>Bach1</i>     | <i>Ythdc2</i>      | <i>C8Orf76</i>    | <i>Rb1</i>       | <i>Pcbp3</i>    | <i>Id3</i>     | <i>Pml</i>     | <i>Itgal</i>   | <i>Flna</i>    | <i>Alms1</i>  | <i>Mgrn1</i>     |
| <i>Nedd4L</i>    | <i>Usp35</i>       | <i>Sqstm1</i>     | <i>G3Bp1</i>     | <i>Rpl36A</i>   | <i>Pcmt1</i>   | <i>Tp63</i>    | <i>Rab27A</i>  | <i>Akt3</i>    | <i>Fer</i>    | <i>Serpinb10</i> |
| <i>Emp1</i>      | <i>Mitd1</i>       | <i>Notch2</i>     | <i>Linc00472</i> | <i>Snrpc</i>    | <i>Rcn2</i>    | <i>Cdkn1A</i>  | <i>Nlrp3</i>   | <i>Pms2</i>    | <i>Vamp8</i>  | <i>Rab44</i>     |
| <i>Ythdf2</i>    | <i>Mir302A</i>     | <i>Trpv4</i>      | <i>Hilpda</i>    | <i>Actbl2</i>   | <i>Rpl24</i>   | <i>Iscu</i>    | <i>Il6R</i>    | <i>Mapk11</i>  | <i>Ptgdr</i>  | <i>Pdgfrl</i>    |
| <i>Socs1</i>     | <i>Mir424</i>      | <i>Tyro3</i>      | <i>G0S2</i>      | <i>Rufy3</i>    | <i>Txnip</i>   | <i>Brd4</i>    | <i>Nbn</i>     | <i>Eomes</i>   | <i>Znf683</i> | <i>Tbcd</i>      |
| <i>Prnp</i>      | <i>Adamts9-As1</i> | <i>Atf6</i>       | <i>Hspa5</i>     | <i>Tex264</i>   | <i>Cope</i>    | <i>Rrm2</i>    | <i>Mir21</i>   | <i>Bcl3</i>    | <i>Grp</i>    | <i>Sdc2</i>      |
| <i>Hells</i>     | <i>Mir147A</i>     | <i>Ca9</i>        | <i>Bcat2</i>     | <i>Abraxas2</i> | <i>Muc20</i>   | <i>Nr4A1</i>   | <i>Tnfsf11</i> | <i>Mlh1</i>    | <i>Fes</i>    | <i>Anxa3</i>     |
| <i>Eno1</i>      | <i>Mir15A</i>      | <i>Fpr2</i>       | <i>Gdpd5</i>     | <i>Igkc</i>     | <i>Asxl2</i>   | <i>Pik3Ca</i>  | <i>Tbx21</i>   | <i>Il13Ra2</i> | <i>Ube2l</i>  | <i>Ros1</i>      |
| <i>Lamp2</i>     | <i>Mir587</i>      | <i>Fzd7</i>       | <i>Mir874</i>    | <i>Rtl1</i>     | <i>Foxk2</i>   | <i>Rptor</i>   | <i>Cr1</i>     | <i>Btn3A2</i>  | <i>Dysf</i>   | <i>Cpsf6</i>     |
| <i>Stat3</i>     | <i>Pgm5P3-As1</i>  | <i>Sirt6</i>      | <i>Mtor</i>      | <i>H2Ac21</i>   | <i>Golga4</i>  | <i>Srebf2</i>  | <i>Gata3</i>   | <i>Slc15A4</i> | <i>Plcd1</i>  | <i>Golga2</i>    |
| <i>Mir497</i>    | <i>Ddr2</i>        | <i>Abcc5</i>      | <i>Lpin1</i>     | <i>Kbtbd3</i>   | <i>Nap1L4</i>  | <i>P4Hb</i>    | <i>Vdr</i>     | <i>Xbp1</i>    | <i>InsI3</i>  | <i>Ifnw1</i>     |
| <i>Got1</i>      | <i>Yy1</i>         | <i>Bsg</i>        | <i>Prc1</i>      | <i>Srsf8</i>    | <i>Rnf113A</i> | <i>Suv39H1</i> | <i>Ticam1</i>  | <i>Lamp1</i>   | <i>Enpp3</i>  | <i>Rcan2</i>     |
| <i>Decr1</i>     | <i>Sphk1</i>       | <i>Fxr1</i>       | <i>Hspa9</i>     | <i>Ighg4</i>    | <i>Ankhd1</i>  | <i>Atf2</i>    | <i>Lat</i>     | <i>Aprt</i>    | <i>Vamp3</i>  | <i>Tagln</i>     |
| <i>Ech1</i>      | <i>Birc5</i>       | <i>Sqle</i>       | <i>Hadha</i>     | <i>Kiaa1614</i> | <i>Copg2</i>   | <i>Brd2</i>    | <i>Il23R</i>   | <i>Tnfsf18</i> | <i>Muc6</i>   | <i>Igfbp6</i>    |

|                |                  |                  |                |                 |                 |                |                |                 |                 |                |
|----------------|------------------|------------------|----------------|-----------------|-----------------|----------------|----------------|-----------------|-----------------|----------------|
| <i>Dhodh</i>   | <i>Efemp1</i>    | <i>Ttbk2</i>     | <i>Ruvbl1</i>  | <i>Tuba4B</i>   | <i>Gcn1</i>     | <i>Brd3</i>    | <i>Il18R1</i>  | <i>Ptgdr2</i>   | <i>Gzmk</i>     | <i>Atxn3</i>   |
| <i>Stk11</i>   | <i>Hnrmpa2B1</i> | <i>Cep290</i>    | <i>Cbx3</i>    | <i>Igkv1-5</i>  | <i>Snrpa1</i>   | <i>Brdt</i>    | <i>Hspd1</i>   | <i>Rara</i>     | <i>Cubn</i>     | <i>H4C9</i>    |
| <i>Pla2G6</i>  | <i>Lonp1</i>     | <i>Igf2Bp3</i>   | <i>Nap1L1</i>  | <i>Iglv3-19</i> | <i>Armc5</i>    | <i>Ncoa3</i>   | <i>Slamf1</i>  | <i>Cavin1</i>   | <i>Kmt5B</i>    | <i>Per2</i>    |
| <i>Hnrmpd</i>  | <i>Wdr5</i>      | <i>Itgb8</i>     | <i>Mt1G</i>    | <i>Net1</i>     | <i>Hcfc2</i>    | <i>Nr5A2</i>   | <i>Clec4D</i>  | <i>Cd300A</i>   | <i>Fap</i>      | <i>Mboat7</i>  |
| <i>Tigar</i>   | <i>Fbln1</i>     | <i>Lasp1</i>     | <i>H19</i>     | <i>Mir494</i>   | <i>Lancl2</i>   | <i>Panx2</i>   | <i>Pglyrp1</i> | <i>Ptger4</i>   | <i>Prkd3</i>    | <i>Zbtb7B</i>  |
| <i>Ftl</i>     | <i>Cd82</i>      | <i>Apoc1</i>     | <i>Mir106B</i> | <i>Aifm1</i>    | <i>Nap1L5</i>   | <i>Arf6</i>    | <i>Ripk2</i>   | <i>Batf</i>     | <i>Lama2</i>    | <i>Mocs3</i>   |
| <i>Fdft1</i>   | <i>Pdk4</i>      | <i>Copz1</i>     | <i>Tgfb1</i>   | <i>Pdcd1</i>    | <i>Spr1A</i>    | <i>Gdf15</i>   | <i>Stat6</i>   | <i>Ptafr</i>    | <i>Hyal1</i>    | <i>Erlin2</i>  |
| <i>Txnrd1</i>  | <i>Rbmx</i>      | <i>Hlf</i>       | <i>Snca</i>    | <i>Ndufs7</i>   | <i>Foxk1</i>    | <i>Abhd12</i>  | <i>Spp1</i>    | <i>Lgals3Bp</i> | <i>Gapt</i>     | <i>Taf1</i>    |
| <i>Lpcat3</i>  | <i>Asah2</i>     | <i>Rnf182</i>    | <i>Uchl1</i>   | <i>Lpin2</i>    | <i>Klhdc2</i>   | <i>Tfam</i>    | <i>Bcl6</i>    | <i>Mmp3</i>     | <i>Scnn1B</i>   | <i>Loxl2</i>   |
| <i>Fscn1</i>   | <i>Hnrmpc</i>    | <i>Pcdhb14</i>   | <i>Gstp1</i>   | <i>Siah2</i>    | <i>Dusp26</i>   | <i>Rnf113A</i> | <i>Il23A</i>   | <i>Rora</i>     | <i>Postn</i>    | <i>Tmem109</i> |
| <i>Nf2</i>     | <i>Mgst1</i>     | <i>Atxn8Os</i>   | <i>Vim</i>     | <i>Ciao1</i>    | <i>Foxi2</i>    | <i>Ppara</i>   | <i>Slc11A1</i> | <i>Foxo3</i>    | <i>Pscs</i>     | <i>Sulf1</i>   |
| <i>Xrcc6</i>   | <i>Cul9</i>      | <i>Meg8</i>      | <i>Pgk1</i>    | <i>Lpin3</i>    | <i>Foxi3</i>    | <i>Mtf1</i>    | <i>Dnase1</i>  | <i>Igf2R</i>    | <i>Nfkbiz</i>   | <i>Nek1</i>    |
| <i>Cct3</i>    | <i>Isca2</i>     | <i>Mir129-1</i>  | <i>Tuba1A</i>  | <i>Ciao2A</i>   | <i>Otud6A</i>   | <i>Nupr1</i>   | <i>Psm8</i>    | <i>Ccl27</i>    | <i>St3Gal1</i>  | <i>Ghrhr</i>   |
| <i>Atm</i>     | <i>Hnr</i>       | <i>Cers6-As1</i> | <i>Uba1</i>    | <i>Otud1</i>    | <i>Mir124-1</i> | <i>Hsf1</i>    | <i>Rasgrp1</i> | <i>Exo1</i>     | <i>Serpinh1</i> | <i>Ssx2</i>    |
| <i>Tnf</i>     | <i>Smg9</i>      | <i>Linc01833</i> | <i>Aldoa</i>   | <i>Shh</i>      | <i>Mir7-1</i>   | <i>Parp1</i>   | <i>Camp</i>    | <i>Atrx</i>     | <i>Fer1L5</i>   | <i>Mical2</i>  |
| <i>Skp2</i>    | <i>Trim7</i>     | <i>Mir4443</i>   | <i>Fasn</i>    | <i>Tgfb2</i>    | <i>Rpl8</i>     | <i>Parp2</i>   | <i>Mapk14</i>  | <i>Sh2D1B</i>   | <i>Sphk2</i>    | <i>Rnh1</i>    |
| <i>Slc39A7</i> | <i>Hddc3</i>     | <i>Mir761</i>    | <i>Gpi</i>     | <i>Gfra1</i>    | <i>Atp5Mc3</i>  | <i>Parp3</i>   | <i>Aicda</i>   | <i>Sdc1</i>     | <i>Agtr2</i>    | <i>Matn2</i>   |



|                |                  |                |                |                 |               |               |                |                |                |                |
|----------------|------------------|----------------|----------------|-----------------|---------------|---------------|----------------|----------------|----------------|----------------|
| <i>Atg16L1</i> | <i>Yy2</i>       | <i>Egfr</i>    | <i>Myh9</i>    | <i>Pkn2</i>     | <i>Cs</i>     | <i>Parp4</i>  | <i>Cd244</i>   | <i>Cxcl6</i>   | <i>Ndfip1</i>  | <i>Ucp3</i>    |
| <i>Zfp36</i>   | <i>Cisd3</i>     | <i>Pdgfrb</i>  | <i>Tubb4A</i>  | <i>Ubr2</i>     | <i>Emc2</i>   | <i>Parp6</i>  | <i>Lilrb1</i>  | <i>Ifnk</i>    | <i>Actg1</i>   | <i>Nisch</i>   |
| <i>H2Ac1</i>   | <i>Bdnf-As</i>   | <i>Pim1</i>    | <i>Ywhag</i>   | <i>Mir194-1</i> | <i>Acsf2</i>  | <i>Parp8</i>  | <i>Tnfsf4</i>  | <i>Cdr1</i>    | <i>Vamp2</i>   | <i>Slco2A1</i> |
| <i>Mef2C</i>   | <i>Hulc</i>      | <i>Fads2</i>   | <i>Anxa1</i>   | <i>Mir1228</i>  | <i>Nox3</i>   | <i>Parp9</i>  | <i>Relb</i>    | <i>Manba</i>   | <i>Ddit3</i>   | <i>Nkx2-3</i>  |
| <i>Bap1</i>    | <i>Mir370</i>    | <i>Igf2Bp2</i> | <i>Eno2</i>    | <i>Mir27A</i>   | <i>Nox5</i>   | <i>Parp10</i> | <i>Il33</i>    | <i>Nmi</i>     | <i>Selenop</i> | <i>Bckdk</i>   |
| <i>Tgfb1</i>   | <i>Mir338</i>    | <i>Dpep1</i>   | <i>Rpl5</i>    | <i>Aurka</i>    | <i>Duox1</i>  | <i>Parp11</i> | <i>Fn1</i>     | <i>Idua</i>    | <i>Snap23</i>  | <i>Ap4M1</i>   |
| <i>Adcy10</i>  | <i>Oip5-As1</i>  | <i>Fabp4</i>   | <i>Acvr1B</i>  | <i>Cdkn2A</i>   | <i>Duox2</i>  | <i>Parp12</i> | <i>Lyn</i>     | <i>Lcp1</i>    | <i>Tk2</i>     | <i>Pram1</i>   |
| <i>Ssbp1</i>   | <i>Mir3200</i>   | <i>Fabp1</i>   | <i>Eif4A1</i>  | <i>Ripk1</i>    | <i>G6Pd</i>   | <i>Parp14</i> | <i>Cxcr2</i>   | <i>Gpr183</i>  | <i>Lox</i>     | <i>Entpd7</i>  |
| <i>ErbB2</i>   | <i>Linc00616</i> | <i>Cdk14</i>   | <i>Gnb3</i>    | <i>Trpv1</i>    | <i>Pgd</i>    | <i>Parp15</i> | <i>Nckap1L</i> | <i>Dll1</i>    | <i>Pla2G3</i>  | <i>Fkbp8</i>   |
| <i>Ctsb</i>    | <i>Mir1287</i>   | <i>Dnajb6</i>  | <i>Hsp90B1</i> | <i>Braf</i>     | <i>Nras</i>   | <i>Parp16</i> | <i>Hla-Dra</i> | <i>Eif2Ak4</i> | <i>Socs5</i>   | <i>Map2K5</i>  |
| <i>Tlr4</i>    | <i>Esr1</i>      | <i>Galnt14</i> | <i>Ldhb</i>    | <i>Casp8</i>    | <i>Hras</i>   | <i>Creb3</i>  | <i>Ccr2</i>    | <i>Nfatc4</i>  | <i>Slc6A3</i>  | <i>Map1B</i>   |
| <i>Pkm</i>     | <i>Ep300</i>     | <i>Me1</i>     | <i>Rpsa</i>    | <i>Sf3B2</i>    | <i>Aloxe3</i> | <i>Creb5</i>  | <i>Kars1</i>   | <i>C8G</i>     | <i>Mtr</i>     | <i>Cdc40</i>   |
| <i>Ywhae</i>   | <i>Creb1</i>     | <i>Alg3</i>    | <i>Smc3</i>    | <i>Mcu</i>      | <i>Mapk3</i>  | <i>Akt1S1</i> | <i>Lbp</i>     | <i>Ighv1-2</i> | <i>Cracr2A</i> | <i>Sucnr1</i>  |
| <i>Nr1H4</i>   | <i>Kdm5C</i>     | <i>Chmp1A</i>  | <i>Ywhab</i>   | <i>Mir4715</i>  | <i>Zeb1</i>   | <i>Mlst8</i>  | <i>Ipo8</i>    | <i>Cd177</i>   | <i>Siglec6</i> | <i>Ctbs</i>    |
| <i>Cdc25A</i>  | <i>Pebp1</i>     | <i>Arpc1A</i>  | <i>Atp5F1A</i> | <i>Chek2</i>    | <i>Cdo1</i>   | <i>Cdh1</i>   | <i>Coro1A</i>  | <i>Rfx1</i>    | <i>Clcf1</i>   | <i>Add1</i>    |
| <i>Rack1</i>   | <i>Tfap2A</i>    | <i>Klf2</i>    | <i>Cfl1</i>    | <i>Ar</i>       | <i>Myb</i>    | <i>Kif20A</i> | <i>Bcr</i>     | <i>Nck1</i>    | <i>Eea1</i>    | <i>Mmp16</i>   |
| <i>S100A13</i> | <i>Ndufa6</i>    | <i>Dlgap1</i>  | <i>Tspan31</i> | <i>Atg13</i>    | <i>Rbpms</i>  | <i>Atad5</i>  | <i>Prrg2</i>   | <i>Ptpn21</i>  | <i>Itm2A</i>   | <i>Tox4</i>    |

|                  |                |                  |                |                |                 |                |                |                 |                |                |
|------------------|----------------|------------------|----------------|----------------|-----------------|----------------|----------------|-----------------|----------------|----------------|
| <i>Emp3</i>      | <i>Aox1</i>    | <i>Slc16A7</i>   | <i>Vps39</i>   | <i>Lims1</i>   | <i>Thbs3</i>    | <i>Tmem98</i>  | <i>Sanbr</i>   | <i>Stk17A</i>   | <i>Chml</i>    | <i>Hmbs</i>    |
| <i>Crabp2</i>    | <i>Itpka</i>   | <i>Mas1</i>      | <i>Slc16A5</i> | <i>Or2H2</i>   | <i>Zfp1</i>     | <i>Dmx1</i>    | <i>Brsk2</i>   | <i>Gjc1</i>     | <i>Pkmyt1</i>  | <i>Capns1</i>  |
| <i>Supt6H</i>    | <i>Fam168B</i> | <i>Snx4</i>      | <i>Zscan12</i> | <i>Prr3</i>    | <i>Rnf216P1</i> | <i>Acy1</i>    | <i>Mvd</i>     | <i>Arhgef11</i> | <i>Cdh6</i>    | <i>Cetn2</i>   |
| <i>Dlgap4</i>    | <i>Rap2A</i>   | <i>Sgsm3</i>     | <i>Col16A1</i> | <i>Shc2</i>    | <i>Frmppd4</i>  | <i>Nit1</i>    | <i>Ppp6R2</i>  | <i>Sned1</i>    | <i>Hmces</i>   | <i>Ttc30A</i>  |
| <i>Dpp4</i>      | <i>Ube2D3</i>  | <i>Agap2-As1</i> | <i>Myh10</i>   | <i>Smarca4</i> | <i>Fads1</i>    | <i>Ezh2</i>    | <i>Il27</i>    | <i>Pdpk1</i>    | <i>Ank1</i>    | <i>Trio</i>    |
| <i>Mir30E</i>    | <i>Kdm3B</i>   | <i>Mir132</i>    | <i>Hp</i>      | <i>Npm1</i>    | <i>Elovl5</i>   | <i>Srsf9</i>   | <i>Calr</i>    | <i>Ifne</i>     | <i>Igfbp3</i>  | <i>Ccdc85B</i> |
| <i>Rps3A</i>     | <i>Erc6</i>    | <i>Sox15</i>     | <i>Dpysl2</i>  | <i>Fgfr4</i>   | <i>Tafazzin</i> | <i>Camkk2</i>  | <i>Trem2</i>   | <i>Krt5</i>     | <i>Mad2L2</i>  | <i>Svep1</i>   |
| <i>Rpl7</i>      | <i>Ddb1</i>    | <i>Qsox1</i>     | <i>Dlst</i>    | <i>Cftr</i>    | <i>Abcc1</i>    | <i>Mpc1</i>    | <i>Socs3</i>   | <i>Xrcc1</i>    | <i>Skap1</i>   | <i>Slc12A1</i> |
| <i>Ttn-As1</i>   | <i>Rai14</i>   | <i>Psg3</i>      | <i>Shld1</i>   | <i>Atp2C1</i>  | <i>Sgcd</i>     | <i>Thbs2</i>   | <i>Kcnk3</i>   | <i>Maz</i>      | <i>Sspn</i>    | <i>Klrf2</i>   |
| <i>Rab2A</i>     | <i>Etv1</i>    | <i>Tgfb1I1</i>   | <i>Lamb1</i>   | <i>Wscd1</i>   | <i>Gdf11</i>    | <i>Gbf1</i>    | <i>Abca6</i>   | <i>Rpl23</i>    | <i>Esm1</i>    | <i>Mln</i>     |
| <i>Rab5B</i>     | <i>Klh9</i>    | <i>Sec16A</i>    | <i>Rabgef1</i> | <i>Dock10</i>  | <i>Ptgir</i>    | <i>Cdh17</i>   | <i>Znrf4</i>   | <i>Thoc1</i>    | <i>Nek7</i>    | <i>Mfng</i>    |
| <i>Phf14</i>     | <i>Zyx</i>     | <i>Rs1</i>       | <i>Reep5</i>   | <i>Dmac2L</i>  | <i>Emx2</i>     | <i>Snx6</i>    | <i>Tulp3</i>   | <i>Serpib7</i>  | <i>Magea12</i> | <i>Yipf3</i>   |
| <i>Mta1</i>      | <i>Aldh6A1</i> | <i>Stxbp3</i>    | <i>Tbc1D9B</i> | <i>Atp2C2</i>  | <i>Ptp4A1</i>   | <i>Riox2</i>   | <i>Nkg7</i>    | <i>Loxl3</i>    | <i>Fads3</i>   | <i>Bicral</i>  |
| <i>Dtna</i>      | <i>H2Ac16</i>  | <i>Pck1</i>      | <i>Dyrk2</i>   | <i>Pcsk7</i>   | <i>Iqsec3</i>   | <i>Olfml2A</i> | <i>Npipb3</i>  | <i>Rnf10</i>    | <i>Hoxd3</i>   | <i>Rab3B</i>   |
| <i>Adcyap1R1</i> | <i>Celf2</i>   | <i>Igfbp4</i>    | <i>Pdia5</i>   | <i>Farp2</i>   | <i>Nmnat2</i>   | <i>Cby1</i>    | <i>Btbd2</i>   | <i>Clnk</i>     | <i>C12Orf4</i> | <i>Iffg2</i>   |
| <i>Milr1</i>     | <i>C1Orf21</i> | <i>Nfkbid</i>    | <i>Gdf10</i>   | <i>Msc</i>     | <i>Rer1</i>     | <i>Gamt</i>    | <i>Slc13A3</i> | <i>Mpg</i>      | <i>Rif1</i>    | <i>Dock11</i>  |
| <i>Rasa4</i>     | <i>Aplf</i>    | <i>Kmt5C</i>     | <i>Glb1L2</i>  | <i>Or1E1</i>   | <i>Meis3P1</i>  | <i>Ca12</i>    | <i>Shld2</i>   | <i>Ppp2R3A</i>  | <i>Magea10</i> | <i>Acacb</i>   |

|               |               |                |             |                |              |               |               |               |              |             |
|---------------|---------------|----------------|-------------|----------------|--------------|---------------|---------------|---------------|--------------|-------------|
| <i>Nfib</i>   | <i>Cep162</i> | <i>Prune2</i>  | <i>Hlx</i>  | <i>Runx1T1</i> | <i>Shld3</i> | <i>Praf2</i>  | <i>Gabra1</i> | <i>Paxip1</i> | <i>Fgf13</i> | <i>En2</i>  |
| <i>Golim4</i> | <i>Vrk2</i>   | <i>Zscan26</i> | <i>Rhoq</i> | <i>Cep170B</i> | <i>Spg7</i>  | <i>Slc7A1</i> | <i>Cel</i>    | <i>Moxd1</i>  | <i>Dusp9</i> | <i>Tcta</i> |
| <i>Sri</i>    | <i>Rbm15B</i> | <i>Nktr</i>    | <i>Has2</i> |                |              |               |               |               |              |             |

---

**Supplementary Table 4.** The 80 Ferroptosis immune-related differentially expressed genes

| Ferroptosis immune-related differentially expressed genes |                |                 |               |                |
|-----------------------------------------------------------|----------------|-----------------|---------------|----------------|
| <i>Ltf</i>                                                | <i>Lamb1</i>   | <i>Fbln5</i>    | <i>Pdia4</i>  | <i>Col6A2</i>  |
| <i>Cxcl6</i>                                              | <i>Hla-Dmb</i> | <i>Serpinh1</i> | <i>Lamc2</i>  | <i>Casp8</i>   |
| <i>Thbs2</i>                                              | <i>C3Ar1</i>   | <i>Rps12</i>    | <i>Me1</i>    | <i>Dock10</i>  |
| <i>Itgb2</i>                                              | <i>Ifi35</i>   | <i>Alox5</i>    | <i>Stat3</i>  | <i>Alox12</i>  |
| <i>Pycard</i>                                             | <i>Ccr2</i>    | <i>Ezh2</i>     | <i>Lat</i>    | <i>Vamp2</i>   |
| <i>Tgfb1</i>                                              | <i>Fcgr2B</i>  | <i>Mmd</i>      | <i>Gsk3B</i>  | <i>Mtr</i>     |
| <i>Irf8</i>                                               | <i>Dock2</i>   | <i>Rac2</i>     | <i>Kif20A</i> | <i>Itgb8</i>   |
| <i fn1<="" i=""></i>                                      | <i>Dyrk2</i>   | <i>Anxa4</i>    | <i>Parp8</i>  | <i>Golga2</i>  |
| <i>Ccl19</i>                                              | <i>Lcn2</i>    | <i>Rbbp4</i>    | <i>Anxa2</i>  | <i>Ccdc6</i>   |
| <i>Ccl5</i>                                               | <i>Gpr183</i>  | <i>Ruvbl1</i>   | <i>Cd86</i>   | <i>Sned1</i>   |
| <i>Cx3Cr1</i>                                             | <i>Fcer1G</i>  | <i>Il18</i>     | <i>Cybb</i>   | <i>Sptb</i>    |
| <i>Gzmk</i>                                               | <i>Il33</i>    | <i>Myd88</i>    | <i>Itga4</i>  | <i>Ngf</i>     |
| <i>Rrm2</i>                                               | <i>Cdh6</i>    | <i>Cd44</i>     | <i>Hnrnp1</i> | <i>Acacb</i>   |
| <i>Coro1A</i>                                             | <i>Celf2</i>   | <i>Agps</i>     | <i>Gfra1</i>  | <i>Nr4A3</i>   |
| <i>Cd1C</i>                                               | <i>Igkc</i>    | <i>Syk</i>      | <i>Eno1</i>   | <i>Cel</i>     |
| <i>Itgam</i>                                              | <i>Muc1</i>    | <i>Slamf1</i>   | <i>Svep1</i>  | <i>C1Orf21</i> |

**Supplementary Table 5.** GSEA analysis of GSE30122 dataset.

| Description                               | setSize | enrichmentScore | NES          | P value     | P. adjust   | q values    |
|-------------------------------------------|---------|-----------------|--------------|-------------|-------------|-------------|
| REACTOME_PI3K_EVENTS_IN_ERBB2_SIGNALING   | 14      | -0.731448998    | -1.8482515   | 0.003508772 | 0.048373984 | 0.040853096 |
| BIOCARTA_IL10_PATHWAY                     | 13      | 0.804338956     | 2.03172492   | 0.002242152 | 0.037265955 | 0.031472074 |
| REACTOME_PRE_NOTCH_PROCESSING_IN_GOLGI    | 16      | -0.56066507     | -1.455775032 | 0.049469965 | 0.25123618  | 0.21217553  |
| BIOCARTA_IL17_PATHWAY                     | 15      | 0.722883279     | 1.901383315  | 0.002272727 | 0.037265955 | 0.031472074 |
| WP_ALLOGRAFT_REJECTION                    | 81      | 0.712900541     | 2.69837751   | 0.002314815 | 0.037265955 | 0.031472074 |
| WP_TYROBP_CAUSAL_NETWORK                  | 50      | 0.756030068     | 2.660507699  | 0.002237136 | 0.037265955 | 0.031472074 |
| KEGG_SYSTEMIC_LUPUS_ERYTHEMATOSUS         | 49      | 0.7336247       | 2.578245829  | 0.002227171 | 0.037265955 | 0.031472074 |
| REACTOME_INTERFERON_GAMMA_SIGNALING       | 77      | 0.672766725     | 2.534557377  | 0.002257336 | 0.037265955 | 0.031472074 |
| KEGG_LEISHMANIA_INFECTIO                  | 67      | 0.68438176      | 2.531363378  | 0.002257336 | 0.037265955 | 0.031472074 |
| KEGG_ALLOGRAFT_REJECTION                  | 33      | 0.792590088     | 2.528490236  | 0.002309469 | 0.037265955 | 0.031472074 |
| WP_TYPE_II_INTERFERON_SIGNALING_IFNG      | 36      | 0.772371703     | 2.515469212  | 0.00228833  | 0.037265955 | 0.031472074 |
| REACTOME_INTERLEUKIN_10_SIGNALING         | 43      | 0.727747185     | 2.481716145  | 0.002252252 | 0.037265955 | 0.031472074 |
| REACTOME_INTERFERON_ALPHA_BETA_SIGNALING  | 68      | 0.661312271     | 2.450590042  | 0.002277904 | 0.037265955 | 0.031472074 |
| REACTOME_INITIAL_TRIGGERING_OF_COMPLEMENT | 22      | 0.846856864     | 2.448478021  | 0.002320186 | 0.037265955 | 0.031472074 |
| KEGG_TYPE_I_DIABETES_MELLITUS             | 39      | 0.732396464     | 2.433937964  | 0.002262443 | 0.037265955 | 0.031472074 |

**Abbreviation:** GSEA, Gene Set Enrichment Analysis; NES, normalized enrichment score.

**Supplementary Table 6.** mRNA-miRNA interaction network nodes.

| node1        |   | node2           |
|--------------|---|-----------------|
| <i>Il18</i>  | - | hsa-miR-197-3p  |
| <i>Myd88</i> | - | hsa-miR-1286    |
| <i>Myd88</i> | - | hsa-miR-510-5p  |
| <i>Myd88</i> | - | hsa-miR-4731-5p |
| <i>Myd88</i> | - | hsa-miR-665     |
| <i>Myd88</i> | - | hsa-miR-3127-5p |
| <i>Myd88</i> | - | hsa-miR-126-5p  |
| <i>Myd88</i> | - | hsa-miR-365b-3p |
| <i>Myd88</i> | - | hsa-miR-365a-3p |
| <i>Myd88</i> | - | hsa-miR-212-5p  |
| <i>Myd88</i> | - | hsa-miR-30b-5p  |
| <i>Myd88</i> | - | hsa-miR-30e-5p  |
| <i>Myd88</i> | - | hsa-miR-30a-5p  |
| <i>Myd88</i> | - | hsa-miR-30c-5p  |
| <i>Myd88</i> | - | hsa-miR-30d-5p  |
| <i>Myd88</i> | - | hsa-miR-5691    |
| <i>Myd88</i> | - | hsa-miR-138-5p  |
| <i>Myd88</i> | - | hsa-miR-766-5p  |
| <i>Myd88</i> | - | hsa-miR-1343-3p |
| <i>Myd88</i> | - | hsa-miR-455-5p  |

**Note:** “mRNA” and “miRNA” represent node, “-” represent edge.

**Supplementary Table 7.** mRNA-TF interaction network nodes.

| mRNA          |   | TF     |
|---------------|---|--------|
| <i>Myd88</i>  | - | ELK4   |
| <i>Myd88</i>  | - | ETS1   |
| <i>Myd88</i>  | - | MYC    |
| <i>Myd88</i>  | - | NCOR1  |
| <i>Myd88</i>  | - | BRD2   |
| <i>Myd88</i>  | - | PHF8   |
| <i>Myd88</i>  | - | POLR2A |
| <i>Myd88</i>  | - | SPI1   |
| <i>Myd88</i>  | - | AR     |
| <i>Myd88</i>  | - | ZNF263 |
| <i>Ccl5</i>   | - | AR     |
| <i>Ccl5</i>   | - | ZNF263 |
| <i>Fcgr2b</i> | - | SPI1   |
| <i>Il18</i>   | - | EP300  |
| <i>Il18</i>   | - | SPI1   |
| <i>Il18</i>   | - | TRIM28 |
| <i>Il18</i>   | - | AR     |

**Note:** "mRNA" and "TF" represent node, "-" represent edge.

**Supplementary Table 8.** mRNA-drug interaction network nodes.

| mRNA          |   | drug         |
|---------------|---|--------------|
| <i>Il18</i>   | - | MEDI-2338    |
| <i>Il18</i>   | - | GSK-1070806  |
| <i>Il18</i>   | - | IBOCTADEKIN  |
| <i>Il18</i>   | - | THYROXINE    |
| <i>Il18</i>   | - | TACROLIMUS   |
| <i>Il18</i>   | - | RIBAVIRIN    |
| <i>Il18</i>   | - | COLCHICINE   |
| <i>Cybb</i>   | - | CHRYSIN      |
| <i>Cybb</i>   | - | APIGENIN     |
| <i>Cybb</i>   | - | LUTEOLIN     |
| <i>Fcgr2b</i> | - | MGD-010      |
| <i>Fcgr2b</i> | - | VALZIFLOCEPT |
| <i>Fcgr2b</i> | - | ALDESLEUKIN  |
| <i>Myd88</i>  | - | BAZLITORAN   |
| <i>Myd88</i>  |   | TOMIVOSERTIB |
| <i>Myd88</i>  | - | IBRUTINIB    |
| <i>Myd88</i>  | - | VORINOSTAT   |
| <i>Myd88</i>  | - | FENTANYL     |
| <i>Ccr2</i>   | - | CCX140       |
| <i>Ccr2</i>   | - | CHEMBL41275  |
| <i>Ccr2</i>   | - | PLOZALIZUMAB |
| <i>Ccr2</i>   | - | AZD2423      |
| <i>Ccr2</i>   | - | CENICRIVIROC |
| <i>Ccr2</i>   | - | MK-0812      |
| <i>Ccr2</i>   | - | PIMAGEDINE   |
| <i>Ccr2</i>   | - | PLERIXAFOR   |
| <i>Ccr2</i>   | - | PF-04634817  |
| <i>Ccr2</i>   | - | MORPHINE     |
| <i>Ccr2</i>   | - | SIMVASTATIN  |

**Note:** “mRNA” and “drug” represent node, “-” represent edge.
